# Supplementary material for: Examining Arrest and Cigarette Smoking in Emerging Adulthood
Source: PubMed Central journal article supplement — Tob Use Insights. 2020 Feb 6;13:1179173X20904350. doi: 10.1177/1179173X20904350 (PMC7005980; doi:10.1177/1179173x20904350), 2020-02-06
Supplement: 5_Supplemental_File_1_logits_early_adulthood_arrest_xyz3163532750ed4.pdf [file 5_Supplemental_File_1_logits_early_adulthood_arrest_xyz3163532750ed4.pdf]

**SUPPLEMENTAL FILE: LOGIS, EARLY ADULTHOOD  
ARREST (18-21 YEARS) – for reviewers’ perusal, and possible  
inclusion as an embedded link if the article is published online. Not  
for publication in paper form of journal.**

```
. *** Smoking mlogits
.
.
. * males
```

```
. mlogit smokedif10_ord bl.colrace##i.arr1821 arpre18 smokepre18 family_cat usborn if
(female == 0 & colrace != 4), rrr
```

```
Iteration 0: log likelihood = -2298.9745
Iteration 1: log likelihood = -2180.9396
Iteration 2: log likelihood = -2177.7362
Iteration 3: log likelihood = -2177.7321
Iteration 4: log likelihood = -2177.7321
```

```
Multinomial logistic regression                Number of obs    =      2,937
                                                LR chi2(18)      =      242.48
                                                Prob > chi2      =      0.0000
Log likelihood = -2177.7321                    Pseudo R2        =      0.0527
```

| smokedif10_ord |                  | RRR             | Std. Err.       | z           | P> z         | [95% Conf. Interval] |          |
|----------------|------------------|-----------------|-----------------|-------------|--------------|----------------------|----------|
| 0              |                  |                 |                 |             |              |                      |          |
|                | colrace          |                 |                 |             |              |                      |          |
|                | 2                | .9807017        | .1835845        | -0.10       | 0.917        | .6795079             | 1.415401 |
|                | 3                | 1.144618        | .2031826        | 0.76        | 0.447        | .8082817             | 1.620908 |
|                | <b>1.arr1821</b> | <b>1.388533</b> | <b>.2391688</b> | <b>1.91</b> | <b>0.057</b> | .9906963             | 1.946131 |
|                | colrace#arr1821  |                 |                 |             |              |                      |          |
|                | 2 1              | 1.80501         | .5104723        | 2.09        | 0.037        | 1.036937             | 3.142004 |
|                | 3 1              | 1.091044        | .3458625        | 0.27        | 0.783        | .5861521             | 2.030834 |
|                | arpre18          | 1.235313        | .1678561        | 1.56        | 0.120        | .9464869             | 1.612276 |
|                | smokepre18       | 3.323691        | .4039173        | 9.88        | 0.000        | 2.61925              | 4.21759  |
|                | family_cat       | 1.026911        | .1233184        | 0.22        | 0.825        | .8115488             | 1.299424 |
|                | usborn           | 1.194771        | .3663349        | 0.58        | 0.562        | .6550786             | 2.179094 |
|                | _cons            | .071083         | .0236251        | -7.95       | 0.000        | .0370563             | .1363547 |
| 1              |                  | (base outcome)  |                 |             |              |                      |          |
| 2              |                  |                 |                 |             |              |                      |          |
|                | colrace          |                 |                 |             |              |                      |          |
|                | 2                | .8951349        | .153639         | -0.65       | 0.519        | .6394257             | 1.253103 |
|                | 3                | 1.021275        | .1716861        | 0.13        | 0.900        | .7345943             | 1.419835 |
|                | 1.arr1821        | 1.187511        | .2023107        | 1.01        | 0.313        | .8503983             | 1.658261 |
|                | colrace#arr1821  |                 |                 |             |              |                      |          |
|                | 2 1              | 1.490677        | .4183728        | 1.42        | 0.155        | .8599743             | 2.583934 |
|                | 3 1              | 1.053539        | .3350326        | 0.16        | 0.870        | .5648888             | 1.964891 |
|                | arpre18          | 1.053459        | .1443747        | 0.38        | 0.704        | .8053081             | 1.378077 |
|                | smokepre18       | 2.64003         | .3066072        | 8.36        | 0.000        | 2.102579             | 3.314863 |



|                          |       |          |          |       |       |          |
|--------------------------|-------|----------|----------|-------|-------|----------|
| _predict#colrace#arr1821 | 2 1 0 | .7443894 | .0127067 | 58.58 | 0.000 | .7194847 |
| .769294                  |       |          |          |       |       |          |
| .7422294                 | 2 1 1 | .698351  | .0223873 | 31.19 | 0.000 | .6544726 |
| .7955816                 | 2 2 0 | .7565367 | .0199212 | 37.98 | 0.000 | .7174919 |
| .6693619                 | 2 2 1 | .607076  | .0317791 | 19.10 | 0.000 | .5447901 |
| .7711081                 | 2 3 0 | .7310044 | .0204614 | 35.73 | 0.000 | .6909007 |
| .7432481                 | 2 3 1 | .6684929 | .0381411 | 17.53 | 0.000 | .5937377 |
|                          |       |          |          |       |       |          |
| _predict#colrace         | 3 1   | .1436919 | .0089135 | 16.12 | 0.000 | .1262217 |
| .1611621                 |       |          |          |       |       |          |
| .1652629                 | 3 2   | .1394331 | .0131787 | 10.58 | 0.000 | .1136032 |
| .1725262                 | 3 3   | .1442288 | .0144377 | 9.99  | 0.000 | .1159313 |
|                          |       |          |          |       |       |          |
| _predict#arr1821         | 3 0   | .1371567 | .0075845 | 18.08 | 0.000 | .1222914 |
| .152022                  |       |          |          |       |       |          |
| .186045                  | 3 1   | .1599452 | .0133164 | 12.01 | 0.000 | .1338455 |
|                          |       |          |          |       |       |          |
| _predict#colrace#arr1821 | 3 1 0 | .1401901 | .0104069 | 13.47 | 0.000 | .1197929 |
| .1605873                 |       |          |          |       |       |          |
| .188882                  | 3 1 1 | .1539723 | .0178114 | 8.64  | 0.000 | .1190626 |
| .1587357                 | 3 2 0 | .1279688 | .0156977 | 8.15  | 0.000 | .0972019 |
| .2218667                 | 3 2 1 | .173663  | .0245941 | 7.06  | 0.000 | .1254594 |
| .1721398                 | 3 3 0 | .1399878 | .0164044 | 8.53  | 0.000 | .1078358 |
| .2153916                 | 3 3 1 | .1570962 | .0297431 | 5.28  | 0.000 | .0988009 |

-----

.

```
. mlogit smokedif11_ord b1.colrace##i.arr1821 arpre18 smokepre18 family_cat usborn if
(female == 0 & colrace != 4), rrr
```

```
Iteration 0: log likelihood = -2166.5767
Iteration 1: log likelihood = -2062.059
Iteration 2: log likelihood = -2059.1901
Iteration 3: log likelihood = -2059.1875
Iteration 4: log likelihood = -2059.1875
```

```
Multinomial logistic regression      Number of obs      =      2,858
LR chi2(18)                        =      214.78
Prob > chi2                         =      0.0000
Pseudo R2                           =      0.0496

Log likelihood = -2059.1875
```

| smokedif11_ord |                 | RRR             | Std. Err.       | z            | P> z         | [95% Conf. Interval] |          |
|----------------|-----------------|-----------------|-----------------|--------------|--------------|----------------------|----------|
| 0              |                 |                 |                 |              |              |                      |          |
|                | colrace         |                 |                 |              |              |                      |          |
|                | 2               | 1.204698        | .2171933        | 1.03         | 0.302        | .8460896             | 1.7153   |
|                | 3               | 1.038218        | .1900355        | 0.20         | 0.838        | .7252443             | 1.486252 |
|                | 1.arr1821       | <b>1.613476</b> | <b>.2784138</b> | <b>2.77</b>  | <b>0.006</b> | 1.150491             | 2.262777 |
|                | colrace#arr1821 |                 |                 |              |              |                      |          |
|                | 2 1             | .9968007        | .2939709        | -0.01        | 0.991        | .5592123             | 1.776806 |
|                | 3 1             | 1.174116        | .3820332        | 0.49         | 0.622        | .6205078             | 2.221644 |
|                | arpre18         | 1.128761        | .1612858        | 0.85         | 0.397        | .8530525             | 1.493578 |
|                | smokepre18      | 3.07128         | .3787649        | 9.10         | 0.000        | 2.411822             | 3.911053 |
|                | family_cat      | 1.136055        | .1382134        | 1.05         | 0.294        | .8950378             | 1.441973 |
|                | usborn          | .727151         | .2015675        | -1.15        | 0.250        | .4223477             | 1.251927 |
|                | _cons           | .1090377        | .0333212        | -7.25        | 0.000        | .059904              | .1984714 |
| 1              |                 | (base outcome)  |                 |              |              |                      |          |
| 2              |                 |                 |                 |              |              |                      |          |
|                | colrace         |                 |                 |              |              |                      |          |
|                | 2               | <b>.9016563</b> | <b>.1747339</b> | <b>-0.53</b> | <b>0.593</b> | .6167154             | 1.318248 |
|                | 3               | 1.298556        | .226623         | 1.50         | 0.134        | .9223793             | 1.828149 |
|                | 1.arr1821       | <b>1.705952</b> | <b>.2989082</b> | <b>3.05</b>  | <b>0.002</b> | 1.210107             | 2.404972 |
|                | colrace#arr1821 |                 |                 |              |              |                      |          |
|                | 2 1             | 1.538612        | .4529226        | 1.46         | 0.143        | .8640924             | 2.739669 |
|                | 3 1             | 1.251854        | .3819233        | 0.74         | 0.462        | .6884363             | 2.276373 |
|                | arpre18         | 1.444612        | .2000066        | 2.66         | 0.008        | 1.101292             | 1.89496  |
|                | smokepre18      | 2.003038        | .2452107        | 5.67         | 0.000        | 1.575744             | 2.546201 |
|                | family_cat      | 1.020852        | .1236942        | 0.17         | 0.865        | .8050531             | 1.294496 |
|                | usborn          | .9925722        | .2837046        | -0.03        | 0.979        | .5668461             | 1.738037 |
|                | _cons           | .0965702        | .0302324        | -7.47        | 0.000        | .0522835             | .1783697 |

```
. margins colrace##arr1821
```

```
Predictive margins      Number of obs      =      2,858
Model VCE      : OIM
```

```
1._predict      : Pr(smokedif11_ord==0), predict(pr outcome(0))
2._predict      : Pr(smokedif11_ord==1), predict(pr outcome(1))
3._predict      : Pr(smokedif11_ord==2), predict(pr outcome(2))
```

```

-----
-----
Interval]          |          Delta-method
                  |      Margin  Std. Err.      z    P>|z|      [95% Conf.
-----+-----
-----
      _predict#colrace |
      1 1 |      .1268229   .0083125   15.26  0.000   .1105308
.143115
      1 2 |      .1453585   .0143632   10.12  0.000   .1172072
.1735099
      1 3 |      .1287333   .0137694    9.35  0.000   .1017458
.1557208
      _predict#arr1821 |
      1 0 |      .1195537   .0072137   16.57  0.000   .1054151
.1336923
      1 1 |      .1639502   .0136894   11.98  0.000   .1371195
.1907808
      _predict#colrace#arr1821 |
      1 1 0 |      .1149729   .0094673   12.14  0.000   .0964173
.1335284
      1 1 1 |      .158588    .0178226    8.90  0.000   .1236563
.1935198
      1 2 0 |      .1362664   .0170253    8.00  0.000   .1028973
.1696354
      1 2 1 |      .1724486   .0265662    6.49  0.000   .1203798
.2245173
      1 3 0 |      .1145687   .0150515    7.61  0.000   .0850684
.1440691
      1 3 1 |      .1682868   .0308044    5.46  0.000   .1079112
.2286623
      _predict#colrace |
      2 1 |      .7505633   .0107457   69.85  0.000   .7295022
.7716245
      2 2 |      .7295897   .0172352   42.33  0.000   .6958092
.7633701
      2 3 |      .7112984   .0181953   39.09  0.000   .6756363
.7469605
      _predict#arr1821 |
      2 0 |      .7685535   .0092215   83.34  0.000   .7504796
.7866274
      2 1 |      .6515953   .017959    36.28  0.000   .6163962
.6867943
      _predict#colrace#arr1821 |
      2 1 0 |      .7760961   .0122784   63.21  0.000   .7520309
.8001613
      2 1 1 |      .6813484   .0235119   28.98  0.000   .6352659
.7274309
      2 2 0 |      .766942    .0202402   37.89  0.000   .7272719
.806612
      2 2 1 |      .6257095   .0338463   18.49  0.000   .559372
.6920469
      2 3 0 |      .7494764   .0203093   36.90  0.000   .7096709
.7892819
      2 3 1 |      .6041299   .041033    14.72  0.000   .5237066
.6845531

```

```

      _predict#colrace |
.1389348      3 1 | .1226138 .0083272 14.72 0.000 .1062927
.1501975      3 2 | .1250518 .0128297 9.75 0.000 .0999061
.1898235      3 3 | .1599684 .0152325 10.50 0.000 .1301133
      _predict#arr1821 |
.1256306      3 0 | .1118928 .0070092 15.96 0.000 .0981549
.2132881      3 1 | .1844546 .0147112 12.54 0.000 .1556211
      _predict#colrace#arr1821 |
.1272637      3 1 0 | .1089311 .0093535 11.65 0.000 .0905984
.1964243      3 1 1 | .1600636 .0185517 8.63 0.000 .1237029
.1246564      3 2 0 | .0967917 .014217 6.81 0.000 .0689269
.2571159      3 2 1 | .201842 .0282015 7.16 0.000 .146568
.1681479      3 3 0 | .1359549 .0164253 8.28 0.000 .1037619
.2970247      3 3 1 | .2275834 .0354299 6.42 0.000 .1581421
-----
-----

```

```

. mlogit smokedif12_ord b1.colrace##i.arr1821 arpre18 smokepre18 family_cat usborn if
(female == 0 & colrace != 4), rrr

```

```

Iteration 0: log likelihood = -2165.9788
Iteration 1: log likelihood = -2074.8725
Iteration 2: log likelihood = -2073.0102
Iteration 3: log likelihood = -2073.0093
Iteration 4: log likelihood = -2073.0093

```

```

Multinomial logistic regression      Number of obs      =      2,857
LR chi2(18)                          =      185.94
Prob > chi2                          =      0.0000
Pseudo R2                             =      0.0429

Log likelihood = -2073.0093

```

```

-----
smokedif12_ord |          RRR   Std. Err.      z    P>|z|      [95% Conf. Interval]
-----+-----
0
  colrace
    2 |      1.10123   .1942666     0.55  0.585   .7793251     1.5561
    3 |      .9609614   .1773053    -0.22  0.829   .6693484     1.37962
  1.arr1821 |      2.133169   .3553307     4.55  0.000   1.538995     2.956742
colrace#arr1821
  2 1 |      .7551387   .215003    -0.99  0.324   .432188     1.319413
  3 1 |      .81767     .2661015    -0.62  0.536   .43208     1.547362
  arpre18 |      1.013683   .14233     0.10  0.923   .7698147     1.334807
  smokepre18 |      2.290266   .2773902     6.84  0.000   1.806305     2.903895
  family_cat |      .8241421   .0984036    -1.62  0.105   .6521801     1.041446
-----

```



|          |                          |  |          |          |       |       |          |
|----------|--------------------------|--|----------|----------|-------|-------|----------|
| .1426104 | 1 3 0                    |  | .1127828 | .0152184 | 7.41  | 0.000 | .0829553 |
| .2261693 | 1 3 1                    |  | .1641944 | .0316204 | 5.19  | 0.000 | .1022195 |
|          |                          |  |          |          |       |       |          |
|          | _predict#colrace         |  |          |          |       |       |          |
| .7621687 | 2 1                      |  | .7406178 | .0109956 | 67.36 | 0.000 | .7190669 |
| .7511863 | 2 2                      |  | .7175386 | .0171675 | 41.80 | 0.000 | .6838908 |
| .784505  | 2 3                      |  | .7493997 | .0179112 | 41.84 | 0.000 | .7142943 |
|          |                          |  |          |          |       |       |          |
|          | _predict#arr1821         |  |          |          |       |       |          |
| .786266  | 2 0                      |  | .7681674 | .0092341 | 83.19 | 0.000 | .7500689 |
| .6853702 | 2 1                      |  | .6499463 | .0180738 | 35.96 | 0.000 | .6145223 |
|          |                          |  |          |          |       |       |          |
|          | _predict#colrace#arr1821 |  |          |          |       |       |          |
| .8018187 | 2 1 0                    |  | .777349  | .0124847 | 62.26 | 0.000 | .7528794 |
| .6873105 | 2 1 1                    |  | .6389139 | .0246926 | 25.87 | 0.000 | .5905174 |
| .7774893 | 2 2 0                    |  | .738137  | .0200781 | 36.76 | 0.000 | .6987846 |
| .7239685 | 2 2 1                    |  | .6600908 | .0325913 | 20.25 | 0.000 | .596213  |
| .8185823 | 2 3 0                    |  | .7799327 | .0197195 | 39.55 | 0.000 | .7412832 |
| .7447573 | 2 3 1                    |  | .665815  | .0402774 | 16.53 | 0.000 | .5868727 |
|          |                          |  |          |          |       |       |          |
|          | _predict#colrace         |  |          |          |       |       |          |
| .1369386 | 3 1                      |  | .1206464 | .0083125 | 14.51 | 0.000 | .1043541 |
| .1746873 | 3 2                      |  | .1476681 | .0137856 | 10.71 | 0.000 | .1206489 |
| .1517242 | 3 3                      |  | .1243469 | .0139683 | 8.90  | 0.000 | .0969696 |
|          |                          |  |          |          |       |       |          |
|          | _predict#arr1821         |  |          |          |       |       |          |
| .1285935 | 3 0                      |  | .1146841 | .0070967 | 16.16 | 0.000 | .1007747 |
| .1920043 | 3 1                      |  | .164813  | .0138734 | 11.88 | 0.000 | .1376217 |
|          |                          |  |          |          |       |       |          |
|          | _predict#colrace#arr1821 |  |          |          |       |       |          |
| .1240508 | 3 1 0                    |  | .1057311 | .009347  | 11.31 | 0.000 | .0874114 |
| .1977345 | 3 1 1                    |  | .1615509 | .0184614 | 8.75  | 0.000 | .1253673 |
| .1722942 | 3 2 0                    |  | .1405719 | .0161852 | 8.69  | 0.000 | .1088496 |
| .2179252 | 3 2 1                    |  | .167812  | .0255684 | 6.56  | 0.000 | .1176989 |
| .136661  | 3 3 0                    |  | .1072845 | .0149883 | 7.16  | 0.000 | .0779079 |
| .2325827 | 3 3 1                    |  | .1699906 | .0319353 | 5.32  | 0.000 | .1073985 |

-----  
 ----



```
. mlogit smokedif13_ord b1.colrace##i.arr1821 arpre18 smokepre18 family_cat usborn if
(female == 0 & colrace != 4), rrr
```

```
Iteration 0: log likelihood = -2075.0441
Iteration 1: log likelihood = -1988.682
Iteration 2: log likelihood = -1986.1424
Iteration 3: log likelihood = -1986.1395
Iteration 4: log likelihood = -1986.1395
```

```
Multinomial logistic regression      Number of obs      =      2,861
LR chi2(18)                        =      177.81
Prob > chi2                         =      0.0000
Pseudo R2                           =      0.0428

Log likelihood = -1986.1395
```

| smokedif13_ord |                 | RRR            | Std. Err. | z     | P> z  | [95% Conf. Interval] |          |
|----------------|-----------------|----------------|-----------|-------|-------|----------------------|----------|
| -----          |                 |                |           |       |       |                      |          |
| 0              |                 |                |           |       |       |                      |          |
|                | colrace         |                |           |       |       |                      |          |
|                | 2               | 1.150902       | .2092583  | 0.77  | 0.440 | .8058831             | 1.643633 |
|                | 3               | 1.199756       | .2161665  | 1.01  | 0.312 | .842805              | 1.707884 |
|                | 1.arr1821       | 1.344769       | .2411374  | 1.65  | 0.099 | .9462688             | 1.91109  |
|                | colrace#arr1821 |                |           |       |       |                      |          |
|                | 2 1             | 1.051504       | .3158166  | 0.17  | 0.867 | .5836527             | 1.89438  |
|                | 3 1             | 1.059487       | .3437722  | 0.18  | 0.859 | .5609262             | 2.001176 |
|                | arpre18         | 1.147519       | .1611015  | 0.98  | 0.327 | .8714831             | 1.510988 |
|                | smokepre18      | 3.143431       | .3982188  | 9.04  | 0.000 | 2.452287             | 4.029365 |
|                | family_cat      | .8383682       | .1034927  | -1.43 | 0.153 | .6582                | 1.067853 |
|                | usborn          | 1.081897       | .3236778  | 0.26  | 0.792 | .6019037             | 1.944667 |
|                | _cons           | .0809299       | .0263516  | -7.72 | 0.000 | .0427513             | .1532035 |
| -----          |                 |                |           |       |       |                      |          |
| 1              |                 | (base outcome) |           |       |       |                      |          |
| -----          |                 |                |           |       |       |                      |          |
| 2              |                 |                |           |       |       |                      |          |
|                | colrace         |                |           |       |       |                      |          |
|                | 2               | 1.147839       | .20456    | 0.77  | 0.439 | .8094418             | 1.627707 |
|                | 3               | 1.033102       | .1914554  | 0.18  | 0.861 | .718452              | 1.485555 |
|                | 1.arr1821       | 1.222261       | .2283274  | 1.07  | 0.283 | .847526              | 1.762684 |
|                | colrace#arr1821 |                |           |       |       |                      |          |
|                | 2 1             | 1.346259       | .4008672  | 1.00  | 0.318 | .7510548             | 2.413157 |
|                | 3 1             | 1.065275       | .3764884  | 0.18  | 0.858 | .5328815             | 2.129573 |
|                | arpre18         | .9351693       | .1405098  | -0.45 | 0.656 | .6966211             | 1.255405 |
|                | smokepre18      | 2.44367        | .3093575  | 7.06  | 0.000 | 1.906708             | 3.131848 |
|                | family_cat      | .8962314       | .1120716  | -0.88 | 0.381 | .7014222             | 1.145146 |
|                | usborn          | 1.393176       | .468324   | 0.99  | 0.324 | .7208913             | 2.692416 |
|                | _cons           | .0743392       | .0266834  | -7.24 | 0.000 | .0367863             | .1502274 |
| -----          |                 |                |           |       |       |                      |          |

```
. margins colrace##arr1821
```

```
Predictive margins      Number of obs      =      2,861
Model VCE      : OIM
```

```
1._predict      : Pr(smokedif13_ord==0), predict(pr outcome(0))
2._predict      : Pr(smokedif13_ord==1), predict(pr outcome(1))
3._predict      : Pr(smokedif13_ord==2), predict(pr outcome(2))
```

```

-----
-----
Interval]          |          Delta-method
                  |      Margin  Std. Err.      z    P>|z|      [95% Conf.
-----+-----
-----
      _predict#colrace |
      1 1 |      .1179683   .0081766   14.43   0.000   .1019424
.1339942
      1 2 |      .1295499   .0130224    9.95   0.000   .1040264
.1550733
      1 3 |      .1385045   .0142823    9.70   0.000   .1105118
.1664973
      _predict#arr1821 |
      1 0 |      .1168347   .0071171   16.42   0.000   .1028853
.130784
      1 1 |      .1467903   .0127968   11.47   0.000   .121709
.1718716
      _predict#colrace#arr1821 |
      1 1 0 |      .1101203   .0094724   11.63   0.000   .0915548
.1286858
      1 1 1 |      .1378053   .0165915    8.31   0.000   .1052864
.1703241
      1 2 0 |      .1219588   .0153471    7.95   0.000   .0918791
.1520385
      1 2 1 |      .1500144   .0241491    6.21   0.000   .102683
.1973459
      1 3 0 |      .1281022   .0158644    8.07   0.000   .0970087
.1591958
      1 3 1 |      .1653623   .0304349    5.43   0.000   .105711
.2250135
      _predict#colrace |
      2 1 |      .7687925   .0106157   72.42   0.000   .7479862
.7895988
      2 2 |      .7357126   .0167323   43.97   0.000   .7029179
.7685074
      2 3 |      .7466938   .0177347   42.10   0.000   .7119344
.7814531
      _predict#arr1821 |
      2 0 |      .7708462   .0091102   84.61   0.000   .7529905
.7887019
      2 1 |      .7150222   .0166743   42.88   0.000   .6823411
.7477032
      _predict#colrace#arr1821 |
      2 1 0 |      .7805334   .0122822   63.55   0.000   .7564608
.8046061
      2 1 1 |      .7373389   .0218529   33.74   0.000   .6945081
.7801697
      2 2 0 |      .7570207   .0195526   38.72   0.000   .7186983
.795343
      2 2 1 |      .6756396   .032118    21.04   0.000   .6126894
.7385898
      2 3 0 |      .7621583   .0198369   38.42   0.000   .7232787
.8010379
      2 3 1 |      .704504    .0381185   18.48   0.000   .6297932
.7792149

```





|          |                          |  |          |          |       |       |          |
|----------|--------------------------|--|----------|----------|-------|-------|----------|
| .1524572 | 1 3 0                    |  | .1223236 | .0153745 | 7.96  | 0.000 | .0921901 |
| .2348747 | 1 3 1                    |  | .1726764 | .0317344 | 5.44  | 0.000 | .1104781 |
|          |                          |  |          |          |       |       |          |
|          | _predict#colrace         |  |          |          |       |       |          |
| .7927711 | 2 1                      |  | .7719325 | .0106322 | 72.60 | 0.000 | .7510938 |
| .7580538 | 2 2                      |  | .7246245 | .0170561 | 42.48 | 0.000 | .6911952 |
| .7846411 | 2 3                      |  | .7504674 | .0174359 | 43.04 | 0.000 | .7162938 |
|          |                          |  |          |          |       |       |          |
|          | _predict#arr1821         |  |          |          |       |       |          |
| .799845  | 2 0                      |  | .7823625 | .0089198 | 87.71 | 0.000 | .7648799 |
| .7126468 | 2 1                      |  | .6779097 | .0177233 | 38.25 | 0.000 | .6431726 |
|          |                          |  |          |          |       |       |          |
|          | _predict#colrace#arr1821 |  |          |          |       |       |          |
| .8193821 | 2 1 0                    |  | .795984  | .011938  | 66.68 | 0.000 | .7725859 |
| .7488868 | 2 1 1                    |  | .7023569 | .0237402 | 29.59 | 0.000 | .6558271 |
| .8010194 | 2 2 0                    |  | .7626172 | .0195933 | 38.92 | 0.000 | .7242149 |
| .6792798 | 2 2 1                    |  | .6119021 | .034377  | 17.80 | 0.000 | .5445243 |
| .8085196 | 2 3 0                    |  | .77063   | .0193318 | 39.86 | 0.000 | .7327404 |
| .7673839 | 2 3 1                    |  | .6918742 | .038526  | 17.96 | 0.000 | .6163646 |
|          |                          |  |          |          |       |       |          |
|          | _predict#colrace         |  |          |          |       |       |          |
| .1211981 | 3 1                      |  | .1056976 | .0079085 | 13.37 | 0.000 | .0901972 |
| .1512336 | 3 2                      |  | .1255733 | .0130922 | 9.59  | 0.000 | .0999129 |
| .139568  | 3 3                      |  | .11415   | .0129686 | 8.80  | 0.000 | .0887319 |
|          |                          |  |          |          |       |       |          |
|          | _predict#arr1821         |  |          |          |       |       |          |
| .1126768 | 3 0                      |  | .0998307 | .0065543 | 15.23 | 0.000 | .0869845 |
| .1761022 | 3 1                      |  | .1495418 | .0135515 | 11.04 | 0.000 | .1229813 |
|          |                          |  |          |          |       |       |          |
|          | _predict#colrace#arr1821 |  |          |          |       |       |          |
| .1086268 | 3 1 0                    |  | .0916653 | .008654  | 10.59 | 0.000 | .0747038 |
| .1821652 | 3 1 1                    |  | .1462723 | .0183131 | 7.99  | 0.000 | .1103793 |
| .1404038 | 3 2 0                    |  | .1113754 | .0148107 | 7.52  | 0.000 | .082347  |
| .2214811 | 3 2 1                    |  | .1688812 | .0268372 | 6.29  | 0.000 | .1162814 |
| .1350948 | 3 3 0                    |  | .1070464 | .0143107 | 7.48  | 0.000 | .0789979 |
| .1911128 | 3 3 1                    |  | .1354494 | .0284002 | 4.77  | 0.000 | .0797859 |

-----  
----

```
. mlogit smokedif15_ord b1.colrace##i.arr1821 arpre18 smokepre18 family_cat usborn if
(female == 0 & colrace != 4), rrr
```

```
Iteration 0: log likelihood = -1983.3491
Iteration 1: log likelihood = -1903.7746
Iteration 2: log likelihood = -1901.5494
Iteration 3: log likelihood = -1901.5474
Iteration 4: log likelihood = -1901.5474
```

```
Multinomial logistic regression      Number of obs      =      2,799
LR chi2(18)                        =      163.60
Prob > chi2                         =      0.0000
Pseudo R2                           =      0.0412

Log likelihood = -1901.5474
```

| smokedif15_ord |                 | RRR            | Std. Err. | z     | P> z  | [95% Conf. Interval] |          |
|----------------|-----------------|----------------|-----------|-------|-------|----------------------|----------|
| -----          |                 |                |           |       |       |                      |          |
| 0              |                 |                |           |       |       |                      |          |
|                | colrace         |                |           |       |       |                      |          |
|                | 2               | 1.075912       | .1943266  | 0.41  | 0.685 | .7551551             | 1.532911 |
|                | 3               | .9935737       | .1804966  | -0.04 | 0.972 | .6959328             | 1.418511 |
|                | 1.arr1821       | 1.352263       | .2494801  | 1.64  | 0.102 | .9419381             | 1.941333 |
|                | colrace#arr1821 |                |           |       |       |                      |          |
|                | 2 1             | 1.190699       | .3589049  | 0.58  | 0.563 | .6595228             | 2.149682 |
|                | 3 1             | .8736657       | .2966535  | -0.40 | 0.691 | .4490757             | 1.699695 |
|                | arpre18         | 1.00109        | .146821   | 0.01  | 0.994 | .7509915             | 1.334478 |
|                | smokepre18      | 2.598793       | .3261183  | 7.61  | 0.000 | 2.03215              | 3.323438 |
|                | family_cat      | .8944734       | .1108525  | -0.90 | 0.368 | .7015806             | 1.1404   |
|                | usborn          | .6194787       | .1653593  | -1.79 | 0.073 | .3671239             | 1.045298 |
|                | _cons           | .1599456       | .0472712  | -6.20 | 0.000 | .0896197             | .2854571 |
| -----          |                 |                |           |       |       |                      |          |
| 1              |                 | (base outcome) |           |       |       |                      |          |
| -----          |                 |                |           |       |       |                      |          |
| 2              |                 |                |           |       |       |                      |          |
|                | colrace         |                |           |       |       |                      |          |
|                | 2               | 1.19255        | .2300609  | 0.91  | 0.361 | .8170848             | 1.740549 |
|                | 3               | 1.042758       | .2079213  | 0.21  | 0.834 | .705436              | 1.541378 |
|                | 1.arr1821       | 1.771124       | .3307855  | 3.06  | 0.002 | 1.228213             | 2.55402  |
|                | colrace#arr1821 |                |           |       |       |                      |          |
|                | 2 1             | .9900656       | .3033562  | -0.03 | 0.974 | .5430699             | 1.804979 |
|                | 3 1             | .916738        | .3106724  | -0.26 | 0.798 | .4718265             | 1.781181 |
|                | arpre18         | 1.225841       | .1801753  | 1.39  | 0.166 | .919017              | 1.635101 |
|                | smokepre18      | 2.522267       | .3357666  | 6.95  | 0.000 | 1.943025             | 3.274189 |
|                | family_cat      | .8815091       | .1153672  | -0.96 | 0.335 | .6820656             | 1.139272 |
|                | usborn          | .9799328       | .3231006  | -0.06 | 0.951 | .5135001             | 1.870045 |
|                | _cons           | .0798047       | .0285704  | -7.06 | 0.000 | .0395636             | .1609763 |
| -----          |                 |                |           |       |       |                      |          |

```
. margins colrace##arr1821
```

```
Predictive margins      Number of obs      =      2,799
Model VCE      : OIM
```

```
1._predict : Pr(smokedif15_ord==0), predict(pr outcome(0))
2._predict : Pr(smokedif15_ord==1), predict(pr outcome(1))
3._predict : Pr(smokedif15_ord==2), predict(pr outcome(2))
```

```

-----
-----
Interval]          |          Delta-method
                  |      Margin  Std. Err.      z    P>|z|      [95% Conf.
-----+-----
-----
      _predict#colrace |
      1 1 |      .1224688   .008643   14.17   0.000   .1055288
.1394088
      1 2 |      .1334155   .013483    9.90   0.000   .1069894
.1598417
      1 3 |      .1176338   .0130964    8.98   0.000   .0919654
.1433022
      |
      _predict#arr1821 |
      1 0 |      .1175678   .007174   16.39   0.000   .1035071
.1316285
      1 1 |      .143012    .0131145   10.90   0.000   .1173081
.1687159
      |
      _predict#colrace#arr1821 |
      1 1 0 |      .116577    .0098956   11.78   0.000   .097182
.1359719
      1 1 1 |      .1398679    .0179705    7.78   0.000   .1046464
.1750895
      1 2 0 |      .1217194    .0155487    7.83   0.000   .0912445
.1521943
      1 2 1 |      .1670204    .0261869    6.38   0.000   .115695
.2183458
      1 3 0 |      .115405    .0149236    7.73   0.000   .0861553
.1446547
      1 3 1 |      .1248977    .0264878    4.72   0.000   .0729827
.1768128
      |
      _predict#colrace |
      2 1 |      .7704343    .0108786   70.82   0.000   .7491127
.7917559
      2 2 |      .7452679    .0167671   44.45   0.000   .712405
.7781308
      2 3 |      .7732612    .0168744   45.82   0.000   .7401881
.8063344
      |
      _predict#arr1821 |
      2 0 |      .7856211    .0090301   87.00   0.000   .7679225
.8033198
      2 1 |      .7086407    .0170056   41.67   0.000   .6753103
.7419711
      |
      _predict#colrace#arr1821 |
      2 1 0 |      .7909693    .0123648   63.97   0.000   .7667347
.8152039
      2 1 1 |      .7149759    .0233909   30.57   0.000   .6691306
.7608213
      2 2 0 |      .7713105    .0194957   39.56   0.000   .7330997
.8095213
      2 2 1 |      .6732527    .0323942   20.78   0.000   .6097612
.7367442
      2 3 0 |      .7885469    .0189825   41.54   0.000   .7513419
.8257519
      2 3 1 |      .732361    .0356118   20.57   0.000   .6625631
.8021589

```







|          |                          |  |          |          |       |       |          |
|----------|--------------------------|--|----------|----------|-------|-------|----------|
| .1632158 | 1 3 0                    |  | .1274539 | .0182462 | 6.99  | 0.000 | .091692  |
| .2369843 | 1 3 1                    |  | .1714115 | .0334561 | 5.12  | 0.000 | .1058387 |
|          |                          |  |          |          |       |       |          |
|          | _predict#colrace         |  |          |          |       |       |          |
| .7986152 | 2 1                      |  | .7750285 | .0120343 | 64.40 | 0.000 | .7514417 |
| .8082765 | 2 2                      |  | .773636  | .017674  | 43.77 | 0.000 | .7389956 |
| .7900534 | 2 3                      |  | .7516029 | .019618  | 38.31 | 0.000 | .7131524 |
|          |                          |  |          |          |       |       |          |
|          | _predict#arr1821         |  |          |          |       |       |          |
| .8113106 | 2 0                      |  | .7915667 | .0100736 | 78.58 | 0.000 | .7718228 |
| .7492194 | 2 1                      |  | .712896  | .0185327 | 38.47 | 0.000 | .6765725 |
|          |                          |  |          |          |       |       |          |
|          | _predict#colrace#arr1821 |  |          |          |       |       |          |
| .8201239 | 2 1 0                    |  | .7930999 | .013788  | 57.52 | 0.000 | .766076  |
| .7784699 | 2 1 1                    |  | .7288505 | .0253165 | 28.79 | 0.000 | .6792311 |
| .8453585 | 2 2 0                    |  | .8048525 | .0206667 | 38.94 | 0.000 | .7643466 |
| .7605601 | 2 2 1                    |  | .6931999 | .0343681 | 20.17 | 0.000 | .6258396 |
| .8165288 | 2 3 0                    |  | .7726293 | .0223981 | 34.50 | 0.000 | .7287298 |
| .7767449 | 2 3 1                    |  | .6968984 | .0407387 | 17.11 | 0.000 | .6170519 |
|          |                          |  |          |          |       |       |          |
|          | _predict#colrace         |  |          |          |       |       |          |
| .1168599 | 3 1                      |  | .0995959 | .0088083 | 11.31 | 0.000 | .0823319 |
| .1277552 | 3 2                      |  | .1018151 | .013235  | 7.69  | 0.000 | .075875  |
| .1369372 | 3 3                      |  | .1086465 | .0144343 | 7.53  | 0.000 | .0803557 |
|          |                          |  |          |          |       |       |          |
|          | _predict#arr1821         |  |          |          |       |       |          |
| .1074601 | 3 0                      |  | .0930258 | .0073645 | 12.63 | 0.000 | .0785916 |
| .1527638 | 3 1                      |  | .1260491 | .0136302 | 9.25  | 0.000 | .0993344 |
|          |                          |  |          |          |       |       |          |
|          | _predict#colrace#arr1821 |  |          |          |       |       |          |
| .1120285 | 3 1 0                    |  | .0923105 | .0100604 | 9.18  | 0.000 | .0725925 |
| .1544648 | 3 1 1                    |  | .1185436 | .0183275 | 6.47  | 0.000 | .0826224 |
| .1182281 | 3 2 0                    |  | .0883497 | .0152444 | 5.80  | 0.000 | .0584712 |
| .1880463 | 3 2 1                    |  | .1369702 | .0260598 | 5.26  | 0.000 | .085894  |
| .1318687 | 3 3 0                    |  | .0999168 | .0163023 | 6.13  | 0.000 | .0679648 |
| .1904259 | 3 3 1                    |  | .1316901 | .0299678 | 4.39  | 0.000 | .0729543 |

-----  
 ----

```
. mlogit smokedif17_ord b1.colrace##i.arr1821 arpre18 smokepre18 family_cat usborn if
(female == 0 & colrace != 4), rrr
```

```
Iteration 0: log likelihood = -1071.7308
Iteration 1: log likelihood = -999.50859
Iteration 2: log likelihood = -995.66661
Iteration 3: log likelihood = -995.6573
Iteration 4: log likelihood = -995.6573
```

```
Multinomial logistic regression      Number of obs      =      1,602
LR chi2(18)                        =      152.15
Prob > chi2                         =      0.0000
Pseudo R2                           =      0.0710

Log likelihood = -995.6573
```

| smokedif17_ord |                 | RRR            | Std. Err. | z     | P> z  | [95% Conf. Interval] |          |
|----------------|-----------------|----------------|-----------|-------|-------|----------------------|----------|
| 0              |                 |                |           |       |       |                      |          |
|                | colrace         |                |           |       |       |                      |          |
|                | 2               | .8631096       | .240611   | -0.53 | 0.597 | .499775              | 1.490587 |
|                | 3               | 1.1663         | .2956827  | 0.61  | 0.544 | .709597              | 1.91694  |
|                | 1.arr1821       | 1.420787       | .3698689  | 1.35  | 0.177 | .8529793             | 2.366571 |
|                | colrace#arr1821 |                |           |       |       |                      |          |
|                | 2 1             | 1.470042       | .617266   | 0.92  | 0.359 | .6455246             | 3.3477   |
|                | 3 1             | .7578995       | .3541952  | -0.59 | 0.553 | .3032584             | 1.894133 |
|                | arpre18         | 1.468175       | .2832301  | 1.99  | 0.047 | 1.005935             | 2.14282  |
|                | smokepre18      | 3.246173       | .5880249  | 6.50  | 0.000 | 2.276049             | 4.629795 |
|                | family_cat      | .7433296       | .1324545  | -1.66 | 0.096 | .5242098             | 1.054041 |
|                | usborn          | .5850104       | .2144961  | -1.46 | 0.144 | .2851462             | 1.200216 |
|                | _cons           | .1217607       | .0490491  | -5.23 | 0.000 | .055286              | .2681628 |
| 1              |                 | (base outcome) |           |       |       |                      |          |
| 2              |                 |                |           |       |       |                      |          |
|                | colrace         |                |           |       |       |                      |          |
|                | 2               | .9659546       | .2701369  | -0.12 | 0.901 | .5583563             | 1.671098 |
|                | 3               | .9084621       | .2603544  | -0.33 | 0.738 | .5180391             | 1.593129 |
|                | 1.arr1821       | 2.112629       | .5271473  | 3.00  | 0.003 | 1.295477             | 3.445218 |
|                | colrace#arr1821 |                |           |       |       |                      |          |
|                | 2 1             | 1.205927       | .4910977  | 0.46  | 0.646 | .5428508             | 2.678931 |
|                | 3 1             | 1.19818        | .5386709  | 0.40  | 0.688 | .496414              | 2.892014 |
|                | arpre18         | 1.012689       | .2056211  | 0.06  | 0.950 | .6802116             | 1.507676 |
|                | smokepre18      | 3.023145       | .5462988  | 6.12  | 0.000 | 2.121496             | 4.308001 |
|                | family_cat      | .8688544       | .1556101  | -0.78 | 0.432 | .6116436             | 1.234228 |
|                | usborn          | 1.503692       | .8137858  | 0.75  | 0.451 | .5205894             | 4.343324 |
|                | _cons           | .0461842       | .0262459  | -5.41 | 0.000 | .0151623             | .1406763 |

```
. margins colrace##arr1821
```

```
Predictive margins      Number of obs      =      1,602
Model VCE      : OIM
```

```
1._predict      : Pr(smokedif17_ord==0), predict(pr outcome(0))
2._predict      : Pr(smokedif17_ord==1), predict(pr outcome(1))
3._predict      : Pr(smokedif17_ord==2), predict(pr outcome(2))
```

```

-----
-----
Interval]          |          Delta-method
                  |      Margin   Std. Err.      z    P>|z|      [95% Conf.
-----+-----
-----
      _predict#colrace |
      1 1 |      .1060707   .0107107    9.90   0.000   .0850782
.1270632
      1 2 |      .1046904   .0153272    6.83   0.000   .0746495
.1347312
      1 3 |      .1120572   .0167363    6.70   0.000   .0792547
.1448597
      |
      _predict#arr1821 |
      1 0 |      .1004215   .009064    11.08   0.000   .0826563
.1181867
      1 1 |      .1240802   .0153312    8.09   0.000   .0940317
.1541287
      |
      _predict#colrace#arr1821 |
      1 1 0 |      .0999596   .0124222    8.05   0.000   .0756125
.1243066
      1 1 1 |      .1214267   .0216152    5.62   0.000   .0790618
.1637917
      1 2 0 |      .0882075   .0183449    4.81   0.000   .0522522
.1241628
      1 2 1 |      .1438696   .0285551    5.04   0.000   .0879027
.1998366
      1 3 0 |      .1151576   .0200751    5.74   0.000   .075811
.1545041
      1 3 1 |      .1075143   .03063     3.51   0.000   .0474805
.1675481
      |
      _predict#colrace |
      2 1 |      .787643    .0138515   56.86   0.000   .7604946
.8147914
      2 2 |      .7863048    .0199483   39.42   0.000   .7472069
.8254028
      2 3 |      .7835079    .0214724   36.49   0.000   .7414228
.8255931
      |
      _predict#arr1821 |
      2 0 |      .8155632    .0114202   71.41   0.000   .79318
.8379463
      2 1 |      .7127557    .0217106   32.83   0.000   .6702038
.7553077
      |
      _predict#colrace#arr1821 |
      2 1 0 |      .813846     .0156374   52.04   0.000   .7831972
.8444947
      2 1 1 |      .722114     .0306027   23.60   0.000   .6621338
.7820942
      2 2 0 |      .8267966    .0237458   34.82   0.000   .7802557
.8733374
      2 2 1 |      .6854017    .0385794   17.77   0.000   .6097874
.761016
      2 3 0 |      .8073725    .0244878   32.97   0.000   .7593772
.8553678
      2 3 1 |      .7221056    .0454847   15.88   0.000   .6329572
.8112541

```

```

      _predict#colrace |
.1270463      3 1 | .1062863 .010592 10.03 0.000 .0855263
.139707      3 2 | .1090048 .0156647 6.96 0.000 .0783026
.1366336      3 3 | .1044349 .0164283 6.36 0.000 .0722361
      _predict#arr1821 |
.1003117      3 0 | .0840154 .0083146 10.10 0.000 .067719
.198637      3 1 | .163164 .0180988 9.02 0.000 .1276911
      _predict#colrace#arr1821 |
.1083172      3 1 0 | .0861945 .0112873 7.64 0.000 .0640717
.2056002      3 1 1 | .1564593 .0250724 6.24 0.000 .1073183
.120033      3 2 0 | .0849959 .0178764 4.75 0.000 .0499589
.233593      3 2 1 | .1707286 .0320743 5.32 0.000 .1078643
.1110971      3 3 0 | .0774699 .017157 4.52 0.000 .0438427
.2467222      3 3 1 | .1703801 .0389508 4.37 0.000 .0940379
-----

```

```

-----
.
. mlogit smokedif18_ord bl.colrace##i.arr1821 arpre18 smokepre18 family_cat usborn if
(female == 0 & colrace != 4), rrr

```

```

Iteration 0: log likelihood = -691.93389
Iteration 1: log likelihood = -648.08447
Iteration 2: log likelihood = -645.3299
Iteration 3: log likelihood = -645.32135
Iteration 4: log likelihood = -645.32135

```

```

Multinomial logistic regression      Number of obs      =      1,028
LR chi2(18)                          =      93.23
Prob > chi2                            =      0.0000
Log likelihood = -645.32135          Pseudo R2          =      0.0674

```

```

-----
smokedif18_ord |          RRR   Std. Err.      z    P>|z|      [95% Conf. Interval]
-----+-----
0
  colrace
    2 |   .7337218   .2700462   -0.84   0.400   .3566537   1.509441
    3 |   1.055474   .3515397    0.16   0.871   .5494691   2.027456
  1.arr1821 |   2.523589   .7512488    3.11   0.002   1.408069   4.522862
colrace#arr1821
  2 1 |   .9333663   .493017   -0.13   0.896   .3314635   2.628262
  3 1 |   1.046848   .541482    0.09   0.929   .3798389   2.885144
  arpre18 |   .8655151   .2206194   -0.57   0.571   .5251746   1.426414
  smokepre18 |   2.46353   .5396763    4.12   0.000   1.603572   3.784665
  family_cat |   .6725829   .1468777   -1.82   0.069   .438391   1.031882
-----

```



|          |                          |  |          |          |       |       |          |
|----------|--------------------------|--|----------|----------|-------|-------|----------|
| .1470372 | 1 3 0                    |  | .0989514 | .024534  | 4.03  | 0.000 | .0508656 |
| .3071526 | 1 3 1                    |  | .2061813 | .0515169 | 4.00  | 0.000 | .10521   |
|          |                          |  |          |          |       |       |          |
|          | _predict#colrace         |  |          |          |       |       |          |
| .8176594 | 2 1                      |  | .783741  | .0173056 | 45.29 | 0.000 | .7498226 |
| .8343923 | 2 2                      |  | .7834692 | .0259817 | 30.15 | 0.000 | .732546  |
| .8306291 | 2 3                      |  | .7771899 | .0272654 | 28.50 | 0.000 | .7237507 |
|          |                          |  |          |          |       |       |          |
|          | _predict#arr1821         |  |          |          |       |       |          |
| .8552724 | 2 0                      |  | .8276349 | .014101  | 58.69 | 0.000 | .7999973 |
| .7297045 | 2 1                      |  | .6729574 | .0289531 | 23.24 | 0.000 | .6162103 |
|          |                          |  |          |          |       |       |          |
|          | _predict#colrace#arr1821 |  |          |          |       |       |          |
| .8671571 | 2 1 0                    |  | .8304254 | .018741  | 44.31 | 0.000 | .7936938 |
| .7503722 | 2 1 1                    |  | .6691658 | .0414326 | 16.15 | 0.000 | .5879595 |
| .8865504 | 2 2 0                    |  | .8262283 | .0307771 | 26.85 | 0.000 | .7659062 |
| .7759674 | 2 2 1                    |  | .6787882 | .0495822 | 13.69 | 0.000 | .5816089 |
| .8806041 | 2 3 0                    |  | .8201769 | .0308308 | 26.60 | 0.000 | .7597497 |
| .7873801 | 2 3 1                    |  | .6713072 | .059222  | 11.34 | 0.000 | .5552343 |
|          |                          |  |          |          |       |       |          |
|          | _predict#colrace         |  |          |          |       |       |          |
| .1196249 | 3 1                      |  | .0949167 | .0126064 | 7.53  | 0.000 | .0702086 |
| .1731402 | 3 2                      |  | .129836  | .0220944 | 5.88  | 0.000 | .0865317 |
| .1308319 | 3 3                      |  | .0926609 | .0194754 | 4.76  | 0.000 | .0544898 |
|          |                          |  |          |          |       |       |          |
|          | _predict#arr1821         |  |          |          |       |       |          |
| .1034574 | 3 0                      |  | .0828892 | .0104942 | 7.90  | 0.000 | .0623211 |
| .1938546 | 3 1                      |  | .1512011 | .0217624 | 6.95  | 0.000 | .1085476 |
|          |                          |  |          |          |       |       |          |
|          | _predict#colrace#arr1821 |  |          |          |       |       |          |
| .1003025 | 3 1 0                    |  | .0743997 | .013216  | 5.63  | 0.000 | .0484969 |
| .2041793 | 3 1 1                    |  | .1449749 | .0302069 | 4.80  | 0.000 | .0857705 |
| .1548974 | 3 2 0                    |  | .1043921 | .0257685 | 4.05  | 0.000 | .0538868 |
| .2753199 | 3 2 1                    |  | .1918814 | .0425715 | 4.51  | 0.000 | .1084428 |
| .1240196 | 3 3 0                    |  | .0808717 | .0220146 | 3.67  | 0.000 | .0377238 |
| .2025509 | 3 3 1                    |  | .1225115 | .0408372 | 3.00  | 0.003 | .042472  |

-----  
 ----

```
. *mlogit smokedif19_ord b1.colrace##i.arr1821 arpre18 smokepre18 family_cat usborn if
(female == 0 & colrace != 4), rrr
```

```
. *females
```

```
. mlogit smokedif10_ord b1.colrace##i.arr1821 arpre18 smokepre18 family_cat usborn if
(female == 1 & colrace != 4), rrr
```

```
Iteration 0: log likelihood = -2161.8536
Iteration 1: log likelihood = -2009.2954
Iteration 2: log likelihood = -1996.037
Iteration 3: log likelihood = -1995.9759
Iteration 4: log likelihood = -1995.9759
```

```
Multinomial logistic regression      Number of obs   =      3,070
LR chi2(18)                          =      331.76
Prob > chi2                            =      0.0000
Pseudo R2                              =      0.0767

Log likelihood = -1995.9759
```

| smokedif10_ord |                 | RRR            | Std. Err. | z     | P> z  | [95% Conf. Interval] |          |
|----------------|-----------------|----------------|-----------|-------|-------|----------------------|----------|
| 0              |                 |                |           |       |       |                      |          |
|                | colrace         |                |           |       |       |                      |          |
|                | 2               | .4071747       | .0762339  | -4.80 | 0.000 | .2821066             | .58769   |
|                | 3               | .8059499       | .1351756  | -1.29 | 0.198 | .5801532             | 1.119627 |
|                | 1.arr1821       | 2.244953       | .4613968  | 3.93  | 0.000 | 1.500593             | 3.358548 |
|                | colrace#arr1821 |                |           |       |       |                      |          |
|                | 2 1             | .9390912       | .4234739  | -0.14 | 0.889 | .3880314             | 2.272734 |
|                | 3 1             | .6667626       | .3531156  | -0.77 | 0.444 | .2361442             | 1.882631 |
|                | arpre18         | 1.061522       | .1893819  | 0.33  | 0.738 | .7482896             | 1.505874 |
|                | smokepre18      | 3.606965       | .460121   | 10.06 | 0.000 | 2.809045             | 4.631536 |
|                | family_cat      | .7129134       | .087739   | -2.75 | 0.006 | .5601166             | .9073923 |
|                | usborn          | 1.059303       | .3168352  | 0.19  | 0.847 | .5894236             | 1.903762 |
|                | _cons           | .1093601       | .0349207  | -6.93 | 0.000 | .0584863             | .2044859 |
| 1              |                 | (base outcome) |           |       |       |                      |          |
| 2              |                 |                |           |       |       |                      |          |
|                | colrace         |                |           |       |       |                      |          |
|                | 2               | .75826         | .1219005  | -1.72 | 0.085 | .5533196             | 1.039107 |
|                | 3               | .9626724       | .1593082  | -0.23 | 0.818 | .6960126             | 1.331496 |
|                | 1.arr1821       | 1.506251       | .3550796  | 1.74  | 0.082 | .9489367             | 2.390877 |
|                | colrace#arr1821 |                |           |       |       |                      |          |
|                | 2 1             | .7378802       | .3458768  | -0.65 | 0.517 | .2944357             | 1.849189 |
|                | 3 1             | 1.815587       | .8301691  | 1.30  | 0.192 | .7409842             | 4.448619 |
|                | arpre18         | 1.285547       | .2212986  | 1.46  | 0.145 | .9174011             | 1.801428 |
|                | smokepre18      | 3.137765       | .392859   | 9.13  | 0.000 | 2.454975             | 4.010456 |
|                | family_cat      | .7646747       | .0938596  | -2.19 | 0.029 | .6011688             | .972651  |
|                | usborn          | 1.38784        | .4353041  | 1.04  | 0.296 | .7505075             | 2.566396 |
|                | _cons           | .0773239       | .025832   | -7.66 | 0.000 | .0401743             | .1488262 |

```
. margins colrace##arr1821
```



Predictive margins  
 Model VCE : OIM  
 Number of obs = 3,070

1. \_predict : Pr(smokedif10\_ord==0), predict(pr outcome(0))  
 2. \_predict : Pr(smokedif10\_ord==1), predict(pr outcome(1))  
 3. \_predict : Pr(smokedif10\_ord==2), predict(pr outcome(2))

```

-----
-----
Interval]          |          Delta-method
                  |          Margin   Std. Err.      z    P>|z|      [95% Conf.
-----+-----
-----
      _predict#colrace |
      1 1 | .1412823 .0086394 16.35 0.000 .1243493
.1582153
      1 2 | .0680691 .0092543  7.36 0.000 .0499311
.0862072
      1 3 | .1104985 .012875  8.58 0.000 .085264
.135733
      _predict#arr1821 |
      1 0 | .1087216 .0058549 18.57 0.000 .0972461
.120197
      1 1 | .1794193 .0211836  8.47 0.000 .1379003
.2209384
      _predict#colrace#arr1821 |
      1 1 0 | .1306968 .0089982 14.52 0.000 .1130607
.148333
      1 1 1 | .2314656 .0305069  7.59 0.000 .1716732
.291258
      1 2 0 | .0615813 .009297  6.62 0.000 .0433595
.079803
      1 2 1 | .1176445 .03651  3.22 0.001 .0460863
.1892027
      1 3 0 | .1094488 .01326  8.25 0.000 .0834597
.1354379
      1 3 1 | .1250959 .0480708  2.60 0.009 .030879
.2193129
      _predict#colrace |
      2 1 | .7397012 .0107666 68.70 0.000 .718599
.7608033
      2 2 | .82963 .0134621 61.63 0.000 .8032447
.8560152
      2 3 | .7587798 .0168982 44.90 0.000 .72566
.7918996
      _predict#arr1821 |
      2 0 | .7783739 .0076198 102.15 0.000 .7634394
.7933083
      2 1 | .6694394 .0269038 24.88 0.000 .616709
.7221699
      _predict#colrace#arr1821 |
      2 1 0 | .7521929 .0113461 66.30 0.000 .7299549
.7744309
      2 1 1 | .6287468 .0356257 17.65 0.000 .5589217
.698572
  
```

|          |                          |  |          |          |       |       |          |
|----------|--------------------------|--|----------|----------|-------|-------|----------|
| .8633924 | 2 2 0                    |  | .8359695 | .0139915 | 59.75 | 0.000 | .8085467 |
| .8699624 | 2 2 1                    |  | .7789517 | .0464349 | 16.78 | 0.000 | .687941  |
| .8074123 | 2 3 0                    |  | .7735059 | .0172995 | 44.71 | 0.000 | .7395994 |
| .7684566 | 2 3 1                    |  | .6295109 | .070892  | 8.88  | 0.000 | .4905652 |
|          |                          |  |          |          |       |       |          |
|          | _predict#colrace         |  |          |          |       |       |          |
| .1349    | 3 1                      |  | .1190165 | .008104  | 14.69 | 0.000 | .1031329 |
| .1240835 | 3 2                      |  | .1023009 | .0111138 | 9.20  | 0.000 | .0805183 |
| .1578169 | 3 3                      |  | .1307217 | .0138243 | 9.46  | 0.000 | .1036265 |
|          |                          |  |          |          |       |       |          |
|          | _predict#arr1821         |  |          |          |       |       |          |
| .1246667 | 3 0                      |  | .1129046 | .0060012 | 18.81 | 0.000 | .1011425 |
| .1919677 | 3 1                      |  | .1511413 | .0208302 | 7.26  | 0.000 | .1103149 |
|          |                          |  |          |          |       |       |          |
|          | _predict#colrace#arr1821 |  |          |          |       |       |          |
| .1339554 | 3 1 0                    |  | .1171103 | .0085946 | 13.63 | 0.000 | .1002651 |
| .1879005 | 3 1 1                    |  | .1397876 | .0245478 | 5.69  | 0.000 | .0916747 |
| .1253763 | 3 2 0                    |  | .1024492 | .0116977 | 8.76  | 0.000 | .079522  |
| .1709822 | 3 2 1                    |  | .1034038 | .0344794 | 3.00  | 0.003 | .0358255 |
| .1439168 | 3 3 0                    |  | .1170453 | .0137102 | 8.54  | 0.000 | .0901739 |
| .3689856 | 3 3 1                    |  | .2453932 | .0630585 | 3.89  | 0.000 | .1218008 |

-----  
 ----

```
. mlogit smokedif11_ord bl.colrace##i.arr1821 arpre18 smokepre18 family_cat usborn if
(female == 1 & colrace != 4), rrr
```

```
Iteration 0: log likelihood = -2053.1624
Iteration 1: log likelihood = -1935.0639
Iteration 2: log likelihood = -1929.6592
Iteration 3: log likelihood = -1929.6508
Iteration 4: log likelihood = -1929.6508
```

```
Multinomial logistic regression          Number of obs   =    3,013
                                          LR chi2(18)     =    247.02
                                          Prob > chi2     =    0.0000
Log likelihood = -1929.6508              Pseudo R2       =    0.0602
```

| smokedif11_ord |           | RRR      | Std. Err. | z     | P> z  | [95% Conf. Interval] |
|----------------|-----------|----------|-----------|-------|-------|----------------------|
| 0              |           |          |           |       |       |                      |
|                | colrace   |          |           |       |       |                      |
|                | 2         | .6529812 | .112494   | -2.47 | 0.013 | .4658625 .9152582    |
|                | 3         | .8478193 | .1493928  | -0.94 | 0.349 | .6002256 1.197546    |
|                |           |          |           |       |       |                      |
|                | 1.arr1821 | 1.451253 | .3259399  | 1.66  | 0.097 | .9344804 2.253805    |



|          |                          |  |          |          |        |       |          |
|----------|--------------------------|--|----------|----------|--------|-------|----------|
| .134489  | 1 1 0                    |  | .1174766 | .00868   | 13.53  | 0.000 | .1004641 |
| .2021568 | 1 1 1                    |  | .1530326 | .0250638 | 6.11   | 0.000 | .1039084 |
| .1041358 | 1 2 0                    |  | .0831746 | .0106947 | 7.78   | 0.000 | .0622134 |
| .1996691 | 1 2 1                    |  | .12882   | .0361481 | 3.56   | 0.000 | .0579709 |
| .1261698 | 1 3 0                    |  | .1005858 | .0130533 | 7.71   | 0.000 | .0750018 |
| .2786239 | 1 3 1                    |  | .1701756 | .0553318 | 3.08   | 0.002 | .0617273 |
|          |                          |  |          |          |        |       |          |
|          | _predict#colrace         |  |          |          |        |       |          |
| .7854784 | 2 1                      |  | .7648176 | .0105414 | 72.55  | 0.000 | .7441567 |
| .8395412 | 2 2                      |  | .8121987 | .0139505 | 58.22  | 0.000 | .7848563 |
| .8068856 | 2 3                      |  | .7734911 | .0170383 | 45.40  | 0.000 | .7400966 |
|          |                          |  |          |          |        |       |          |
|          | _predict#arr1821         |  |          |          |        |       |          |
| .799834  | 2 0                      |  | .784806  | .0076675 | 102.36 | 0.000 | .7697781 |
| .782034  | 2 1                      |  | .73334   | .0248443 | 29.52  | 0.000 | .6846459 |
|          |                          |  |          |          |        |       |          |
|          | _predict#colrace#arr1821 |  |          |          |        |       |          |
| .7931264 | 2 1 0                    |  | .7712665 | .0111532 | 69.15  | 0.000 | .7494066 |
| .7746186 | 2 1 1                    |  | .7113108 | .0323005 | 22.02  | 0.000 | .648003  |
| .8468519 | 2 2 0                    |  | .8182376 | .0145994 | 56.05  | 0.000 | .7896233 |
| .853784  | 2 2 1                    |  | .7645671 | .0455197 | 16.80  | 0.000 | .6753502 |
| .8109763 | 2 3 0                    |  | .7766562 | .0175106 | 44.35  | 0.000 | .742336  |
| .8730442 | 2 3 1                    |  | .7478714 | .0638649 | 11.71  | 0.000 | .6226985 |
|          |                          |  |          |          |        |       |          |
|          | _predict#colrace         |  |          |          |        |       |          |
| .1295059 | 3 1                      |  | .1138181 | .0080041 | 14.22  | 0.000 | .0981303 |
| .120901  | 3 2                      |  | .0992835 | .0110295 | 9.00   | 0.000 | .077666  |
| .1437879 | 3 3                      |  | .117621  | .0133507 | 8.81   | 0.000 | .091454  |
|          |                          |  |          |          |        |       |          |
|          | _predict#arr1821         |  |          |          |        |       |          |
| .1218637 | 3 0                      |  | .1100964 | .0060038 | 18.34  | 0.000 | .0983291 |
| .1513942 | 3 1                      |  | .1169825 | .0175573 | 6.66   | 0.000 | .0825709 |
|          |                          |  |          |          |        |       |          |
|          | _predict#colrace#arr1821 |  |          |          |        |       |          |
| .1279009 | 3 1 0                    |  | .1112569 | .008492  | 13.10  | 0.000 | .0946129 |
| .182453  | 3 1 1                    |  | .1356566 | .0238761 | 5.68   | 0.000 | .0888602 |
| .1213632 | 3 2 0                    |  | .0985878 | .0116203 | 8.48   | 0.000 | .0758124 |

```

.1724864      3 2 1 | .1066129  .0336095   3.17  0.002   .0407394
.1505446      3 3 0 | .1227581  .0141771   8.66  0.000   .0949715
.1597516      3 3 1 | .081953   .0396939   2.06  0.039   .0041545
-----

```

```

.
. mlogit smokedif12_ord bl.colrace##i.arr1821 arpre18 smokepre18 family_cat usborn if
(female == 1 & colrace != 4), rrr

```

```

Iteration 0:  log likelihood = -1947.2322
Iteration 1:  log likelihood = -1856.6411
Iteration 2:  log likelihood = -1851.078
Iteration 3:  log likelihood = -1851.0583
Iteration 4:  log likelihood = -1851.0583

```

```

Multinomial logistic regression      Number of obs   =      2,980
LR chi2(18)                          =      192.35
Prob > chi2                            =      0.0000
Pseudo R2                              =      0.0494

Log likelihood = -1851.0583

```

| smokedif12_ord  | RRR            | Std. Err. | z     | P> z  | [95% Conf. Interval] |          |
|-----------------|----------------|-----------|-------|-------|----------------------|----------|
| 0               |                |           |       |       |                      |          |
| colrace         |                |           |       |       |                      |          |
| 2               | .6013405       | .1055625  | -2.90 | 0.004 | .4262811             | .8482911 |
| 3               | .9873639       | .1643919  | -0.08 | 0.939 | .7124523             | 1.368355 |
| 1.arr1821       | 1.107826       | .2785506  | 0.41  | 0.684 | .6767785             | 1.813414 |
| colrace#arr1821 |                |           |       |       |                      |          |
| 2 1             | 1.684528       | .7851302  | 1.12  | 0.263 | .6756901             | 4.19961  |
| 3 1             | 1.169189       | .5762299  | 0.32  | 0.751 | .4450136             | 3.07182  |
| arpre18         | 1.366892       | .2505105  | 1.71  | 0.088 | .9544082             | 1.957645 |
| smokepre18      | 2.481546       | .322025   | 7.00  | 0.000 | 1.924259             | 3.200228 |
| family_cat      | .7977073       | .1015372  | -1.78 | 0.076 | .6215804             | 1.02374  |
| usborn          | 1.374375       | .4449038  | 0.98  | 0.326 | .7287184             | 2.592094 |
| _cons           | .0804483       | .0278634  | -7.28 | 0.000 | .0408039             | .1586105 |
| 1               | (base outcome) |           |       |       |                      |          |
| 2               |                |           |       |       |                      |          |
| colrace         |                |           |       |       |                      |          |
| 2               | .8597709       | .147282   | -0.88 | 0.378 | .6145663             | 1.202809 |
| 3               | .9761724       | .1771934  | -0.13 | 0.894 | .6839395             | 1.39327  |
| 1.arr1821       | 1.79301        | .4117657  | 2.54  | 0.011 | 1.143151             | 2.812299 |
| colrace#arr1821 |                |           |       |       |                      |          |
| 2 1             | 1.106415       | .4660404  | 0.24  | 0.810 | .4845937             | 2.526145 |
| 3 1             | .3072336       | .205427   | -1.77 | 0.078 | .0828563             | 1.13923  |
| arpre18         | 1.487669       | .2679839  | 2.21  | 0.027 | 1.045138             | 2.117576 |
| smokepre18      | 2.758282       | .3739816  | 7.48  | 0.000 | 2.114602             | 3.597898 |
| family_cat      | .661937        | .0887669  | -3.08 | 0.002 | .5089428             | .8609229 |
| usborn          | 1.011156       | .3212014  | 0.03  | 0.972 | .5425347             | 1.884555 |
| _cons           | .0909906       | .0311266  | -7.01 | 0.000 | .0465385             | .177902  |

. margins colrace##arr1821

Predictive margins  
 Model VCE : OIM

Number of obs = 2,980

1. \_predict : Pr(smokedif12\_ord==0), predict(pr outcome(0))  
 2. \_predict : Pr(smokedif12\_ord==1), predict(pr outcome(1))  
 3. \_predict : Pr(smokedif12\_ord==2), predict(pr outcome(2))

```
-----
```

| Interval]                | Margin   | Delta-method<br>Std. Err. | z      | P> z  | [95% Conf. |
|--------------------------|----------|---------------------------|--------|-------|------------|
| -----                    |          |                           |        |       |            |
| _predict#colrace         |          |                           |        |       |            |
| 1 1                      | .116071  | .0082935                  | 14.00  | 0.000 | .0998161   |
| .1323259                 |          |                           |        |       |            |
| 1 2                      | .0798497 | .0099278                  | 8.04   | 0.000 | .0603916   |
| .0993078                 |          |                           |        |       |            |
| 1 3                      | .1196172 | .013385                   | 8.94   | 0.000 | .0933831   |
| .1458513                 |          |                           |        |       |            |
| _predict#arr1821         |          |                           |        |       |            |
| 1 0                      | .1052159 | .0059157                  | 17.79  | 0.000 | .0936213   |
| .1168105                 |          |                           |        |       |            |
| 1 1                      | .1243285 | .0192652                  | 6.45   | 0.000 | .0865695   |
| .1620875                 |          |                           |        |       |            |
| _predict#colrace#arr1821 |          |                           |        |       |            |
| 1 1 0                    | .1163684 | .0088267                  | 13.18  | 0.000 | .0990684   |
| .1336684                 |          |                           |        |       |            |
| 1 1 1                    | .1166695 | .0233708                  | 4.99   | 0.000 | .0708636   |
| .1624753                 |          |                           |        |       |            |
| 1 2 0                    | .0753112 | .0101389                  | 7.43   | 0.000 | .0554392   |
| .0951831                 |          |                           |        |       |            |
| 1 2 1                    | .1190395 | .0373716                  | 3.19   | 0.001 | .0457925   |
| .1922865                 |          |                           |        |       |            |
| 1 3 0                    | .1154152 | .0137271                  | 8.41   | 0.000 | .0885106   |
| .1423199                 |          |                           |        |       |            |
| 1 3 1                    | .1513032 | .0502736                  | 3.01   | 0.003 | .0527688   |
| .2498377                 |          |                           |        |       |            |
| _predict#colrace         |          |                           |        |       |            |
| 2 1                      | .7793108 | .0106126                  | 73.43  | 0.000 | .7585105   |
| .8001111                 |          |                           |        |       |            |
| 2 2                      | .8226985 | .0136092                  | 60.45  | 0.000 | .796025    |
| .849372                  |          |                           |        |       |            |
| 2 3                      | .7894656 | .0164527                  | 47.98  | 0.000 | .757219    |
| .8217122                 |          |                           |        |       |            |
| _predict#arr1821         |          |                           |        |       |            |
| 2 0                      | .7993701 | .0075798                  | 105.46 | 0.000 | .7845141   |
| .8142262                 |          |                           |        |       |            |
| 2 1                      | .7415183 | .0251048                  | 29.54  | 0.000 | .6923137   |
| .7907228                 |          |                           |        |       |            |
| _predict#colrace#arr1821 |          |                           |        |       |            |
| 2 1 0                    | .785775  | .0111927                  | 70.20  | 0.000 | .7638378   |
| .8077123                 |          |                           |        |       |            |

```

.789841      2 1 1 | .7251629 .0329997 21.97 0.000 .6604847
.8614255      2 2 0 | .8339241 .0140316 59.43 0.000 .8064227
.8280307      2 2 1 | .7293638 .0503412 14.49 0.000 .6306969
.822232      2 3 0 | .7886136 .0171525 45.98 0.000 .7549953
.9055229      2 3 1 | .7951276 .0563252 14.12 0.000 .6847323
      |
      _predict#colrace |
.1200477      3 1 | .1046183 .0078723 13.29 0.000 .0891889
.1186417      3 2 | .0974518 .0108114 9.01 0.000 .0762619
.1138326      3 3 | .0909172 .0116918 7.78 0.000 .0680018
      |
      _predict#arr1821 |
.1065303      3 0 | .0954139 .0056717 16.82 0.000 .0842975
.1708649      3 1 | .1341533 .0187308 7.16 0.000 .0974416
      |
      _predict#colrace#arr1821 |
.1139728      3 1 0 | .0978566 .0082227 11.90 0.000 .0817403
.2098186      3 1 1 | .1581677 .026353 6.00 0.000 .1065168
.1123701      3 2 0 | .0907648 .0110234 8.23 0.000 .0691594
.230822      3 2 1 | .1515967 .0404218 3.75 0.000 .0723714
.1206784      3 3 0 | .0959711 .012606 7.61 0.000 .0712638
.1130555      3 3 1 | .0535692 .0303507 1.77 0.078 -.005917
-----
-----

```

```

. mlogit smokedif13_ord bl.colrace##i.arr1821 arpre18 smokepre18 family_cat usborn if
(female == 1 & colrace != 4), rrr

```

```

Iteration 0: log likelihood = -1901.0851
Iteration 1: log likelihood = -1810.3896
Iteration 2: log likelihood = -1805.459
Iteration 3: log likelihood = -1805.4465
Iteration 4: log likelihood = -1805.4465

```

```

Multinomial logistic regression      Number of obs      =      2,958
                                      LR chi2(18)          =      191.28
                                      Prob > chi2          =      0.0000
Log likelihood = -1805.4465          Pseudo R2           =      0.0503

```

```

-----
smokedif13_ord |          RRR   Std. Err.      z    P>|z|      [95% Conf. Interval]
-----+-----
0               |
   colrace     |
   2           |   .7636302   .1370232   -1.50  0.133   .5372128   1.085475
   3           |   1.120439   .1977472    0.64  0.519   .7927918   1.583498

```

|                 |  |                |          |       |       |          |          |
|-----------------|--|----------------|----------|-------|-------|----------|----------|
| 1.arr1821       |  | 1.315518       | .3229204 | 1.12  | 0.264 | .8131156 | 2.128342 |
| colrace#arr1821 |  |                |          |       |       |          |          |
| 2 1             |  | 1.841392       | .842841  | 1.33  | 0.182 | .7508178 | 4.51604  |
| 3 1             |  | .7764451       | .4435117 | -0.44 | 0.658 | .2534531 | 2.378614 |
| arpre18         |  | 1.367333       | .251837  | 1.70  | 0.089 | .9530131 | 1.961777 |
| smokepre18      |  | 3.250406       | .4479884 | 8.55  | 0.000 | 2.480964 | 4.258482 |
| family_cat      |  | .8979765       | .1202951 | -0.80 | 0.422 | .6906148 | 1.1676   |
| usborn          |  | 1.154287       | .3650701 | 0.45  | 0.650 | .6210142 | 2.145488 |
| _cons           |  | .0636474       | .021918  | -8.00 | 0.000 | .0324082 | .1249987 |
| -----           |  |                |          |       |       |          |          |
| 1               |  | (base outcome) |          |       |       |          |          |
| -----           |  |                |          |       |       |          |          |
| 2               |  |                |          |       |       |          |          |
| colrace         |  |                |          |       |       |          |          |
| 2               |  | .6833059       | .1160435 | -2.24 | 0.025 | .4898448 | .9531731 |
| 3               |  | .9144569       | .1613365 | -0.51 | 0.612 | .647123  | 1.29223  |
| 1.arr1821       |  | 1.339831       | .3257934 | 1.20  | 0.229 | .8319008 | 2.157884 |
| colrace#arr1821 |  |                |          |       |       |          |          |
| 2 1             |  | 1.69534        | .7632662 | 1.17  | 0.241 | .7015098 | 4.097131 |
| 3 1             |  | 1.825979       | .8610881 | 1.28  | 0.202 | .7245853 | 4.601528 |
| arpre18         |  | 1.087924       | .2061354 | 0.44  | 0.656 | .7504409 | 1.577178 |
| smokepre18      |  | 2.457589       | .3240646 | 6.82  | 0.000 | 1.897874 | 3.182373 |
| family_cat      |  | .6861915       | .0898227 | -2.88 | 0.004 | .5309123 | .8868863 |
| usborn          |  | 1.307624       | .4246365 | 0.83  | 0.409 | .6919334 | 2.471162 |
| _cons           |  | .0868546       | .0301989 | -7.03 | 0.000 | .0439374 | .1716927 |

. margins colrace##arr1821

Predictive margins  
 Model VCE : OIM  
 Number of obs = 2,958

1.\_predict : Pr(smokedif13\_ord==0), predict(pr outcome(0))  
 2.\_predict : Pr(smokedif13\_ord==1), predict(pr outcome(1))  
 3.\_predict : Pr(smokedif13\_ord==2), predict(pr outcome(2))

| Interval] |                  | Margin   | Delta-method<br>Std. Err. | z     | P> z  | [95% Conf. |
|-----------|------------------|----------|---------------------------|-------|-------|------------|
| -----     |                  |          |                           |       |       |            |
|           | _predict#colrace |          |                           |       |       |            |
| .1139546  | 1 1              | .0990222 | .0076187                  | 13.00 | 0.000 | .0840898   |
| .1082737  | 1 2              | .0875414 | .0105779                  | 8.28  | 0.000 | .0668091   |
| .1309956  | 1 3              | .1060714 | .0127167                  | 8.34  | 0.000 | .0811471   |
|           | _predict#arr1821 |          |                           |       |       |            |
| .1057012  | 1 0              | .0946055 | .0056612                  | 16.71 | 0.000 | .0835098   |
| .1592629  | 1 1              | .122065  | .0189789                  | 6.43  | 0.000 | .0848671   |



|                          |       |          |          |        |       |          |
|--------------------------|-------|----------|----------|--------|-------|----------|
| _predict#colrace#arr1821 | 1 1 0 | .0967558 | .0080906 | 11.96  | 0.000 | .0808986 |
| .112613                  |       |          |          |        |       |          |
| .1613195                 | 1 1 1 | .117594  | .0223093 | 5.27   | 0.000 | .0738685 |
| .1001835                 |       |          |          |        |       |          |
| .2394743                 | 1 2 0 | .0795572 | .0105238 | 7.56   | 0.000 | .0589309 |
| .1001835                 |       |          |          |        |       |          |
| .2394743                 | 1 2 1 | .1526053 | .0443217 | 3.44   | 0.001 | .0657363 |
| .1342749                 |       |          |          |        |       |          |
| .1342749                 | 1 3 0 | .1080165 | .0133974 | 8.06   | 0.000 | .0817581 |
| .1739238                 |       |          |          |        |       |          |
| .1739238                 | 1 3 1 | .0941414 | .040706  | 2.31   | 0.021 | .014359  |
|                          |       |          |          |        |       |          |
| _predict#colrace         | 2 1   | .7883728 | .0105245 | 74.91  | 0.000 | .7677452 |
| .8090004                 |       |          |          |        |       |          |
| .8518355                 | 2 2   | .8253789 | .0134985 | 61.15  | 0.000 | .7989223 |
| .8152053                 |       |          |          |        |       |          |
| .8152053                 | 2 3   | .7824092 | .016733  | 46.76  | 0.000 | .749613  |
|                          |       |          |          |        |       |          |
| _predict#arr1821         | 2 0   | .8057746 | .0075108 | 107.28 | 0.000 | .7910537 |
| .8204955                 |       |          |          |        |       |          |
| .7760869                 | 2 1   | .7227744 | .0272007 | 26.57  | 0.000 | .6694619 |
|                          |       |          |          |        |       |          |
| _predict#colrace#arr1821 | 2 1 0 | .7932629 | .011117  | 71.36  | 0.000 | .771474  |
| .8150517                 |       |          |          |        |       |          |
| .8085017                 | 2 1 1 | .7457864 | .0319982 | 23.31  | 0.000 | .683071  |
| .8666585                 |       |          |          |        |       |          |
| .8096907                 | 2 2 0 | .8397891 | .0137091 | 61.26  | 0.000 | .8129198 |
| .8253952                 |       |          |          |        |       |          |
| .8253952                 | 2 2 1 | .7007296 | .0555934 | 12.60  | 0.000 | .5917686 |
| .8280157                 |       |          |          |        |       |          |
| .8280157                 | 2 3 0 | .7917086 | .0171874 | 46.06  | 0.000 | .7580219 |
|                          |       |          |          |        |       |          |
| .8280157                 | 2 3 1 | .6956402 | .0675398 | 10.30  | 0.000 | .5632647 |
|                          |       |          |          |        |       |          |
| _predict#colrace         | 3 1   | .1126049 | .008331  | 13.52  | 0.000 | .0962764 |
| .1289335                 |       |          |          |        |       |          |
| .106917                  | 3 2   | .0870797 | .0101213 | 8.60   | 0.000 | .0672424 |
| .1371933                 |       |          |          |        |       |          |
| .1371933                 | 3 3   | .1115194 | .0130992 | 8.51   | 0.000 | .0858455 |
|                          |       |          |          |        |       |          |
| _predict#arr1821         | 3 0   | .0996199 | .0057915 | 17.20  | 0.000 | .0882687 |
| .1109711                 |       |          |          |        |       |          |
| .1990443                 | 3 1   | .1551606 | .0223901 | 6.93   | 0.000 | .1112769 |
|                          |       |          |          |        |       |          |
| _predict#colrace#arr1821 | 3 1 0 | .1099813 | .0087718 | 12.54  | 0.000 | .092789  |
| .1271736                 |       |          |          |        |       |          |
| .1869073                 | 3 1 1 | .1366196 | .0256574 | 5.32   | 0.000 | .086332  |
| .1004873                 |       |          |          |        |       |          |
| .1004873                 | 3 2 0 | .0806537 | .0101194 | 7.97   | 0.000 | .06082   |

```

.231079      3 2 1 | .1466651 .0430691 3.41 0.001 .0622511
.1257297      3 3 0 | .100275 .0129874 7.72 0.000 .0748202
.3285856      3 3 1 | .2102184 .0603926 3.48 0.000 .0918511
-----

```

```

.
. mlogit smokedif14_ord bl.colrace##i.arr1821 arpre18 smokepre18 family_cat usborn if
(female == 1 & colrace != 4), rrr

```

```

Iteration 0: log likelihood = -1893.0272
Iteration 1: log likelihood = -1793.3277
Iteration 2: log likelihood = -1784.7557
Iteration 3: log likelihood = -1784.7173
Iteration 4: log likelihood = -1784.7173

```

```

Multinomial logistic regression      Number of obs      =      2,932
                                      LR chi2(18)          =      216.62
                                      Prob > chi2          =      0.0000
Log likelihood = -1784.7173          Pseudo R2           =      0.0572

```

| smokedif14_ord  | RRR            | Std. Err. | z     | P> z  | [95% Conf. Interval] |          |
|-----------------|----------------|-----------|-------|-------|----------------------|----------|
| 0               |                |           |       |       |                      |          |
| colrace         |                |           |       |       |                      |          |
| 2               | .7956925       | .1356252  | -1.34 | 0.180 | .5697162             | 1.111302 |
| 3               | 1.136315       | .1945571  | 0.75  | 0.455 | .8123775             | 1.589422 |
| 1.arr1821       | 1.649578       | .3680864  | 2.24  | 0.025 | 1.065212             | 2.554523 |
| colrace#arr1821 |                |           |       |       |                      |          |
| 2 1             | 1.185261       | .5604879  | 0.36  | 0.719 | .4691335             | 2.994549 |
| 3 1             | .7004032       | .3544794  | -0.70 | 0.482 | .2597458             | 1.888634 |
| arpre18         | 1.24422        | .2180883  | 1.25  | 0.213 | .8824656             | 1.754272 |
| smokepre18      | 3.331133       | .4387739  | 9.14  | 0.000 | 2.573194             | 4.312325 |
| family_cat      | .8910031       | .1134334  | -0.91 | 0.365 | .6942453             | 1.143525 |
| usborn          | 1.118413       | .3252652  | 0.38  | 0.700 | .6324836             | 1.977675 |
| _cons           | .0738513       | .0234579  | -8.20 | 0.000 | .0396264             | .1376358 |
| 1               | (base outcome) |           |       |       |                      |          |
| 2               |                |           |       |       |                      |          |
| colrace         |                |           |       |       |                      |          |
| 2               | .8611316       | .1541735  | -0.84 | 0.404 | .6062809             | 1.223109 |
| 3               | 1.145259       | .213533   | 0.73  | 0.467 | .7946901             | 1.650479 |
| 1.arr1821       | 1.332781       | .3505374  | 1.09  | 0.275 | .7959442             | 2.231696 |
| colrace#arr1821 |                |           |       |       |                      |          |
| 2 1             | 3.21587        | 1.363731  | 2.75  | 0.006 | 1.400669             | 7.383485 |
| 3 1             | .8364675       | .4846662  | -0.31 | 0.758 | .2686864             | 2.604069 |
| arpre18         | .984445        | .1963335  | -0.08 | 0.937 | .6659344             | 1.455297 |
| smokepre18      | 2.981725       | .4202161  | 7.75  | 0.000 | 2.262077             | 3.93032  |
| family_cat      | .7748241       | .1078577  | -1.83 | 0.067 | .5898118             | 1.017871 |
| usborn          | 2.196793       | .8964267  | 1.93  | 0.054 | .9872938             | 4.888006 |
| _cons           | .0365444       | .015729   | -7.69 | 0.000 | .0157201             | .0849543 |

. margins colrace##arr1821

Predictive margins  
 Model VCE : OIM  
 Number of obs = 2,932

1. \_predict : Pr(smokedif14\_ord==0), predict(pr outcome(0))  
 2. \_predict : Pr(smokedif14\_ord==1), predict(pr outcome(1))  
 3. \_predict : Pr(smokedif14\_ord==2), predict(pr outcome(2))

```
-----
```

|          |                          | Margin   | Delta-method<br>Std. Err. | z      | P> z  | [95% Conf.<br>Interval] |
|----------|--------------------------|----------|---------------------------|--------|-------|-------------------------|
| -----    |                          |          |                           |        |       |                         |
|          | _predict#colrace         |          |                           |        |       |                         |
| .1305786 | 1 1                      | .1146919 | .0081056                  | 14.15  | 0.000 | .0988051                |
| .1154966 | 1 2                      | .0939664 | .010985                   | 8.55   | 0.000 | .0724362                |
| .1482228 | 1 3                      | .1213318 | .0137201                  | 8.84   | 0.000 | .0944408                |
|          | _predict#arr1821         |          |                           |        |       |                         |
| .1183056 | 1 0                      | .1065851 | .00598                    | 17.82  | 0.000 | .0948646                |
| .1860911 | 1 1                      | .1461644 | .0203712                  | 7.18   | 0.000 | .1062376                |
|          | _predict#colrace#arr1821 |          |                           |        |       |                         |
| .1257982 | 1 1 0                    | .1090881 | .0085257                  | 12.80  | 0.000 | .0923781                |
| .2109192 | 1 1 1                    | .1601723 | .0258918                  | 6.19   | 0.000 | .1094254                |
| .1127488 | 1 2 0                    | .090762  | .011218                   | 8.09   | 0.000 | .0687751                |
| .2065275 | 1 2 1                    | .1254509 | .0413664                  | 3.03   | 0.002 | .0443744                |
| .1477785 | 1 3 0                    | .1198331 | .0142581                  | 8.40   | 0.000 | .0918877                |
| .2274392 | 1 3 1                    | .1335415 | .0479079                  | 2.79   | 0.005 | .0396438                |
|          | _predict#colrace         |          |                           |        |       |                         |
| .815399  | 2 1                      | .7953817 | .0102131                  | 77.88  | 0.000 | .7753645                |
| .8371437 | 2 2                      | .8098115 | .0139452                  | 58.07  | 0.000 | .7824793                |
| .8136866 | 2 3                      | .780063  | .0171552                  | 45.47  | 0.000 | .7464394                |
|          | _predict#arr1821         |          |                           |        |       |                         |
| .8204825 | 2 0                      | .8057299 | .007527                   | 107.05 | 0.000 | .7909773                |
| .7633961 | 2 1                      | .7106015 | .0269365                  | 26.38  | 0.000 | .6578069                |
|          | _predict#colrace#arr1821 |          |                           |        |       |                         |
| .8236987 | 2 1 0                    | .8025741 | .010778                   | 74.46  | 0.000 | .7814496                |

```

.797258      2 1 1 | .7347733 .0318806 23.05 0.000 .6722885
.8575963      2 2 0 | .8297701 .0141973 58.45 0.000 .801944
.7471132      2 2 1 | .6328662 .0582903 10.86 0.000 .5186193
.8172169      2 3 0 | .7823047 .0178127 43.92 0.000 .7473924
.8816652      2 3 1 | .7611537 .0614866 12.38 0.000 .6406422
      |
      _predict#colrace |
      3 1 | .0899264 .007343 12.25 0.000 .0755343
.1043185      3 2 | .0962221 .0107754 8.93 0.000 .0751028
.1173414      3 3 | .0986052 .0127773 7.72 0.000 .0735621
.1236483      |
      _predict#arr1821 |
      3 0 | .087685 .0054975 15.95 0.000 .07691
.0984599      3 1 | .1432341 .0210567 6.80 0.000 .1019638
.1845045      |
      _predict#colrace#arr1821 |
      3 1 0 | .0883377 .0077697 11.37 0.000 .0731094
.1035661      3 1 1 | .1050544 .0220193 4.77 0.000 .0618974
.1482113      3 2 0 | .0794679 .0103178 7.70 0.000 .0592453
.0996905      3 2 1 | .2416828 .0525062 4.60 0.000 .1387726
.344593       3 3 0 | .0978623 .013283 7.37 0.000 .0718281
.1238964      3 3 1 | .1053048 .0450115 2.34 0.019 .0170839
.1935258
-----
-----

```

```

. mlogit smokedif15_ord bl.colrace##i.arr1821 arpre18 smokepre18 family_cat usborn if
(female == 1 & colrace != 4), rrr

```

```

Iteration 0: log likelihood = -1742.9362
Iteration 1: log likelihood = -1626.128
Iteration 2: log likelihood = -1615.4232
Iteration 3: log likelihood = -1615.3721
Iteration 4: log likelihood = -1615.3721

```

```

Multinomial logistic regression      Number of obs      =      2,851
                                      LR chi2(18)         =      255.13
                                      Prob > chi2         =      0.0000
Log likelihood = -1615.3721          Pseudo R2          =      0.0732

```

```

-----
smokedif15_ord |          RRR   Std. Err.      z    P>|z|      [95% Conf. Interval]
-----+-----
0               |
  colrace      |
    2          |   .6644029   .1245952   -2.18  0.029   .4600511   .9595264
    3          |   .8746978   .1653419   -0.71  0.479   .6038897   1.266947

```

|                 |  |                |          |       |       |          |          |
|-----------------|--|----------------|----------|-------|-------|----------|----------|
| 1.arr1821       |  | .7666379       | .2092196 | -0.97 | 0.330 | .449048  | 1.308844 |
| colrace#arr1821 |  |                |          |       |       |          |          |
| 2 1             |  | 5.921659       | 2.579061 | 4.08  | 0.000 | 2.521851 | 13.90488 |
| 3 1             |  | .9010965       | .6239041 | -0.15 | 0.880 | .2319603 | 3.500491 |
| arpre18         |  | 1.197028       | .2326011 | 0.93  | 0.355 | .817905  | 1.751887 |
| smokepre18      |  | 3.583841       | .5114271 | 8.94  | 0.000 | 2.709438 | 4.740436 |
| family_cat      |  | .8509827       | .1184185 | -1.16 | 0.246 | .6478459 | 1.117814 |
| usborn          |  | 2.162966       | .9505515 | 1.76  | 0.079 | .9140607 | 5.118284 |
| _cons           |  | .0362779       | .0166591 | -7.22 | 0.000 | .014749  | .089232  |
| -----           |  |                |          |       |       |          |          |
| 1               |  | (base outcome) |          |       |       |          |          |
| -----           |  |                |          |       |       |          |          |
| 2               |  |                |          |       |       |          |          |
| colrace         |  |                |          |       |       |          |          |
| 2               |  | .9225703       | .166911  | -0.45 | 0.656 | .6471434 | 1.31522  |
| 3               |  | 1.146739       | .2137137 | 0.73  | 0.463 | .7958461 | 1.652342 |
| 1.arr1821       |  | .9307896       | .2449459 | -0.27 | 0.785 | .5557122 | 1.559025 |
| colrace#arr1821 |  |                |          |       |       |          |          |
| 2 1             |  | 1.402284       | .7517871 | 0.63  | 0.528 | .4903355 | 4.010318 |
| 3 1             |  | .7565528       | .4749332 | -0.44 | 0.657 | .2210494 | 2.58934  |
| arpre18         |  | 1.507053       | .275572  | 2.24  | 0.025 | 1.05313  | 2.156626 |
| smokepre18      |  | 4.129738       | .6089936 | 9.62  | 0.000 | 3.093141 | 5.513728 |
| family_cat      |  | .6790272       | .0973534 | -2.70 | 0.007 | .5126829 | .8993432 |
| usborn          |  | 1.682554       | .655949  | 1.33  | 0.182 | .7836559 | 3.61254  |
| _cons           |  | .0391604       | .0161916 | -7.84 | 0.000 | .0174141 | .0880629 |

. margins colrace##arr1821

Predictive margins  
 Model VCE : OIM  
 Number of obs = 2,851

1.\_predict : Pr(smokedif15\_ord==0), predict(pr outcome(0))  
 2.\_predict : Pr(smokedif15\_ord==1), predict(pr outcome(1))  
 3.\_predict : Pr(smokedif15\_ord==2), predict(pr outcome(2))

| Interval] |                  | Margin   | Delta-method<br>Std. Err. | z     | P> z  | [95% Conf.] |
|-----------|------------------|----------|---------------------------|-------|-------|-------------|
| -----     |                  |          |                           |       |       |             |
|           | _predict#colrace |          |                           |       |       |             |
| .1159144  | 1 1              | .100711  | .007757                   | 12.98 | 0.000 | .0855075    |
| .1122486  | 1 2              | .0911071 | .0107867                  | 8.45  | 0.000 | .0699656    |
| .1112922  | 1 3              | .0875514 | .0121129                  | 7.23  | 0.000 | .0638105    |
|           | _predict#arr1821 |          |                           |       |       |             |
| .1038516  | 1 0              | .0926799 | .0056999                  | 16.26 | 0.000 | .0815083    |
| .1592478  | 1 1              | .1219489 | .0190304                  | 6.41  | 0.000 | .0846501    |

|                          |       |          |          |        |       |           |
|--------------------------|-------|----------|----------|--------|-------|-----------|
| _predict#colrace#arr1821 | 1 1 0 | .1030834 | .0083637 | 12.33  | 0.000 | .0866909  |
| .119476                  |       |          |          |        |       |           |
| .1187657                 | 1 1 1 | .0823113 | .0185995 | 4.43   | 0.000 | .0458569  |
| .0927013                 | 1 2 0 | .0724594 | .0103277 | 7.02   | 0.000 | .0522176  |
| .3443489                 | 1 2 1 | .2427467 | .0518388 | 4.68   | 0.000 | .1411446  |
| .1150227                 | 1 3 0 | .090051  | .0127409 | 7.07   | 0.000 | .0650792  |
| .1415147                 | 1 3 1 | .0675279 | .0377491 | 1.79   | 0.074 | -.0064589 |
|                          |       |          |          |        |       |           |
| _predict#colrace         | 2 1   | .8085509 | .0099595 | 81.18  | 0.000 | .7890306  |
| .8280712                 |       |          |          |        |       |           |
| .8481093                 | 2 2   | .8210662 | .0137978 | 59.51  | 0.000 | .794023   |
| .8430524                 | 2 3   | .8112138 | .0162445 | 49.94  | 0.000 | .7793751  |
|                          |       |          |          |        |       |           |
| _predict#arr1821         | 2 0   | .8144307 | .0074159 | 109.82 | 0.000 | .7998959  |
| .8289656                 |       |          |          |        |       |           |
| .8367517                 | 2 1   | .7915354 | .02307   | 34.31  | 0.000 | .7463191  |
|                          |       |          |          |        |       |           |
| _predict#colrace#arr1821 | 2 1 0 | .8059434 | .0106762 | 75.49  | 0.000 | .7850184  |
| .8268684                 |       |          |          |        |       |           |
| .8784634                 | 2 1 1 | .8293137 | .0250769 | 33.07  | 0.000 | .7801639  |
| .8662275                 | 2 2 0 | .8385004 | .0141468 | 59.27  | 0.000 | .8107732  |
| .7806709                 | 2 2 1 | .6726228 | .0551276 | 12.20  | 0.000 | .5645748  |
| .8391199                 | 2 3 0 | .8058234 | .0169884 | 47.43  | 0.000 | .7725268  |
| .953997                  | 2 3 1 | .8524842 | .0517932 | 16.46  | 0.000 | .7509715  |
|                          |       |          |          |        |       |           |
| _predict#colrace         | 3 1   | .0907381 | .0073443 | 12.35  | 0.000 | .0763435  |
| .1051327                 |       |          |          |        |       |           |
| .1086916                 | 3 2   | .0878268 | .0106455 | 8.25   | 0.000 | .0669619  |
| .1262973                 | 3 3   | .1012349 | .0127872 | 7.92   | 0.000 | .0761725  |
|                          |       |          |          |        |       |           |
| _predict#arr1821         | 3 0   | .0928893 | .0056907 | 16.32  | 0.000 | .0817358  |
| .1040429                 |       |          |          |        |       |           |
| .1168278                 | 3 1   | .0865157 | .0154657 | 5.59   | 0.000 | .0562035  |
|                          |       |          |          |        |       |           |
| _predict#colrace#arr1821 | 3 1 0 | .0909732 | .0079159 | 11.49  | 0.000 | .0754584  |
| .1064879                 |       |          |          |        |       |           |
| .124592                  | 3 1 1 | .088375  | .0184784 | 4.78   | 0.000 | .052158   |
| .1110497                 | 3 2 0 | .0890402 | .0112296 | 7.93   | 0.000 | .0670307  |

```

.1490511      3 2 1 | .0846304 .0328683 2.57 0.010 .0202097
.130571      3 3 0 | .1041257 .0134928 7.72 0.000 .0776803
.1556839      3 3 1 | .0799879 .0386211 2.07 0.038 .0042918
-----

```

```

.
. mlogit smokedif16_ord bl.colrace##i.arr1821 arpre18 smokepre18 family_cat usborn if
(female == 1 & colrace != 4), rrr

```

```

Iteration 0: log likelihood = -1438.1686
Iteration 1: log likelihood = -1355.8122
Iteration 2: log likelihood = -1351.2096
Iteration 3: log likelihood = -1351.2054
Iteration 4: log likelihood = -1351.2054

```

```

Multinomial logistic regression      Number of obs      =      2,275
LR chi2(18)                          =      173.93
Prob > chi2                            =      0.0000
Pseudo R2                              =      0.0605

Log likelihood = -1351.2054

```

| smokedif16_ord  | RRR            | Std. Err. | z     | P> z  | [95% Conf. Interval] |          |
|-----------------|----------------|-----------|-------|-------|----------------------|----------|
| 0               |                |           |       |       |                      |          |
| colrace         |                |           |       |       |                      |          |
| 2               | 1.03922        | .1982539  | 0.20  | 0.840 | .7150263             | 1.510402 |
| 3               | 1.09914        | .2242747  | 0.46  | 0.643 | .736833              | 1.639597 |
| 1.arr1821       | 1.822051       | .4930171  | 2.22  | 0.027 | 1.07211              | 3.096576 |
| colrace#arr1821 |                |           |       |       |                      |          |
| 2 1             | 1.055376       | .5163942  | 0.11  | 0.912 | .4044968             | 2.753589 |
| 3 1             | .6212406       | .4002688  | -0.74 | 0.460 | .1757219             | 2.196311 |
| arpre18         | 1.462189       | .2950894  | 1.88  | 0.060 | .9845087             | 2.171638 |
| smokepre18      | 3.39766        | .5194283  | 8.00  | 0.000 | 2.517965             | 4.584691 |
| family_cat      | .76375         | .1156553  | -1.78 | 0.075 | .5676139             | 1.02766  |
| usborn          | .7907538       | .2602742  | -0.71 | 0.476 | .4148307             | 1.507342 |
| _cons           | .0934714       | .033606   | -6.59 | 0.000 | .0462003             | .1891096 |
| 1               | (base outcome) |           |       |       |                      |          |
| 2               |                |           |       |       |                      |          |
| colrace         |                |           |       |       |                      |          |
| 2               | .894438        | .1803206  | -0.55 | 0.580 | .6024849             | 1.327866 |
| 3               | .9189164       | .2020273  | -0.38 | 0.701 | .5972224             | 1.413891 |
| 1.arr1821       | 1.785742       | .4968038  | 2.08  | 0.037 | 1.035165             | 3.080548 |
| colrace#arr1821 |                |           |       |       |                      |          |
| 2 1             | .859759        | .4722545  | -0.28 | 0.783 | .2929697             | 2.523078 |
| 3 1             | .6292725       | .448783   | -0.65 | 0.516 | .1555181             | 2.546223 |
| arpre18         | 1.336591       | .290594   | 1.33  | 0.182 | .8728413             | 2.046737 |
| smokepre18      | 3.256042       | .5254341  | 7.32  | 0.000 | 2.373176             | 4.467351 |
| family_cat      | .7553336       | .1205893  | -1.76 | 0.079 | .5523878             | 1.032841 |
| usborn          | 1.082317       | .431659   | 0.20  | 0.843 | .4953026             | 2.365037 |
| _cons           | .0689638       | .029377   | -6.28 | 0.000 | .0299247             | .1589327 |

. margins colrace##arr1821

Predictive margins  
Model VCE : OIM

Number of obs = 2,275

1. \_predict : Pr(smokedif16\_ord==0), predict(pr outcome(0))  
2. \_predict : Pr(smokedif16\_ord==1), predict(pr outcome(1))  
3. \_predict : Pr(smokedif16\_ord==2), predict(pr outcome(2))

```
-----  
-----  
Interval] |          Delta-method  
           |          Margin   Std. Err.      z    P>|z|      [95% Conf.  
-----+-----  
-----  
    _predict#colrace |  
      1 1 |      .102164   .0089151   11.46   0.000   .0846907  
.1196372      1 2 |      .1082263   .0129991    8.33   0.000   .0827486  
.1337041      1 3 |      .1073227   .0147765    7.26   0.000   .0783613  
.136284  
    _predict#arr1821 |  
      1 0 |      .1000647   .0065723   15.23   0.000   .0871832  
.1129461      1 1 |      .1460782   .0235351    6.21   0.000   .0999502  
.1922062  
_predict#colrace#arr1821 |  
  1 1 0 |      .096937   .0093189   10.40   0.000   .0786724  
.1152017      1 1 1 |      .1483545   .0294691    5.03   0.000   .0905961  
.2061128      1 2 0 |      .1015067   .0131751    7.70   0.000   .0756839  
.1273295      1 2 1 |      .1662288   .0499257    3.33   0.001   .0683763  
.2640814      1 3 0 |      .1062376   .0150822    7.04   0.000   .076677  
.1357982      1 3 1 |      .1165849   .055327    2.11   0.035   .008146  
.2250239  
    _predict#colrace |  
      2 1 |      .8009646   .0116066   69.01   0.000   .7782162  
.823713      2 2 |      .806169   .0159677   50.49   0.000   .774873  
.8374651      2 3 |      .807369   .0184755   43.70   0.000   .7711577  
.8435804  
    _predict#arr1821 |  
      2 0 |      .8116997   .0083907   96.74   0.000   .7952543  
.8281452      2 1 |      .7330718   .0295026   24.85   0.000   .6752477  
.7908958  
_predict#colrace#arr1821 |  
  2 1 0 |      .8108151   .0121618   66.67   0.000   .7869785  
.8346517
```



```

.7880982      2 1 1 | .7130079 .0383121 18.61 0.000 .6379176
.8475822      2 2 0 | .8153583 .016441 49.59 0.000 .7831345
.8398518      2 2 1 | .7248614 .0586697 12.35 0.000 .609871
.8461775      2 3 0 | .8092331 .0188495 42.93 0.000 .7722888
.9303931      2 3 1 | .7912914 .0709716 11.15 0.000 .6521896
      |
      _predict#colrace |
      3 1 | .0968714 .0087217 11.11 0.000 .0797773
.1139656      3 2 | .0856046 .0116634 7.34 0.000 .0627447
.1084646      3 3 | .0853083 .0135145 6.31 0.000 .0588203
.1117963      |
      _predict#arr1821 |
      3 0 | .0882356 .0062336 14.15 0.000 .076018
.1004533      3 1 | .12085 .0215471 5.61 0.000 .0786185
.1630815      |
      _predict#colrace#arr1821 |
      3 1 0 | .0922479 .0091057 10.13 0.000 .074401
.1100947      3 1 1 | .1386376 .0289273 4.79 0.000 .0819413
.195334      3 2 0 | .083135 .0119825 6.94 0.000 .0596496
.1066203      3 2 1 | .1089098 .0418126 2.60 0.009 .0269586
.190861      3 3 0 | .0845293 .0137959 6.13 0.000 .0574899
.1115686      3 3 1 | .0921237 .0510158 1.81 0.071 -.0078654
.1921128
-----
-----

```

```

. mlogit smokedif17_ord bl.colrace##i.arr1821 arpre18 smokepre18 family_cat usborn if
(female == 1 & colrace != 4), rrr

```

```

Iteration 0: log likelihood = -986.6396
Iteration 1: log likelihood = -930.45582
Iteration 2: log likelihood = -924.41378
Iteration 3: log likelihood = -924.37921
Iteration 4: log likelihood = -924.37921

```

```

Multinomial logistic regression      Number of obs      =      1,667
LR chi2(18)                          =      124.52
Prob > chi2                            =      0.0000
Pseudo R2                              =      0.0631

Log likelihood = -924.37921

```

```

-----
smokedif17_ord |          RRR   Std. Err.      z    P>|z|      [95% Conf. Interval]
-----+-----
0
   colrace |
      2 |      1.00367   .2339227     0.02  0.987   .6356294   1.584814
      3 |      1.041535  .2591091     0.16  0.870   .6396096   1.696026
-----

```

|                 |  |                |          |       |       |          |          |
|-----------------|--|----------------|----------|-------|-------|----------|----------|
| 1.arr1821       |  | 1.545311       | .4938002 | 1.36  | 0.173 | .8260697 | 2.890781 |
| colrace#arr1821 |  |                |          |       |       |          |          |
| 2 1             |  | .6684826       | .476522  | -0.56 | 0.572 | .1653173 | 2.703098 |
| 3 1             |  | .2824175       | .3139983 | -1.14 | 0.255 | .0319526 | 2.496187 |
| arpre18         |  | 1.189642       | .3103777 | 0.67  | 0.506 | .7134076 | 1.983786 |
| smokepre18      |  | 3.225222       | .5998628 | 6.30  | 0.000 | 2.239977 | 4.643822 |
| family_cat      |  | .7903437       | .1451246 | -1.28 | 0.200 | .5514632 | 1.132701 |
| usborn          |  | 1.034096       | .4509815 | 0.08  | 0.939 | .439888  | 2.430972 |
| _cons           |  | .0714368       | .0336799 | -5.60 | 0.000 | .0283537 | .1799838 |
| -----           |  |                |          |       |       |          |          |
| 1               |  | (base outcome) |          |       |       |          |          |
| -----           |  |                |          |       |       |          |          |
| 2               |  |                |          |       |       |          |          |
| colrace         |  |                |          |       |       |          |          |
| 2               |  | 1.070242       | .2739798 | 0.27  | 0.791 | .6480012 | 1.767616 |
| 3               |  | 1.275307       | .3342424 | 0.93  | 0.353 | .7630015 | 2.131593 |
| 1.arr1821       |  | 1.913862       | .6123756 | 2.03  | 0.042 | 1.02224  | 3.583178 |
| colrace#arr1821 |  |                |          |       |       |          |          |
| 2 1             |  | 1.990087       | 1.085073 | 1.26  | 0.207 | .68354   | 5.794023 |
| 3 1             |  | .6851058       | .5220657 | -0.50 | 0.620 | .1538592 | 3.050647 |
| arpre18         |  | 1.250787       | .3288472 | 0.85  | 0.395 | .747123  | 2.093991 |
| smokepre18      |  | 3.85852        | .7664458 | 6.80  | 0.000 | 2.61421  | 5.695097 |
| family_cat      |  | .8563199       | .1662686 | -0.80 | 0.424 | .5852767 | 1.252884 |
| usborn          |  | 2.2689         | 1.408226 | 1.32  | 0.187 | .6722096 | 7.658186 |
| _cons           |  | .0225843       | .0147568 | -5.80 | 0.000 | .0062752 | .081281  |

. margins colrace##arr1821

Predictive margins  
 Model VCE : OIM  
 Number of obs = 1,667

1.\_predict : Pr(smokedif17\_ord==0), predict(pr outcome(0))  
 2.\_predict : Pr(smokedif17\_ord==1), predict(pr outcome(1))  
 3.\_predict : Pr(smokedif17\_ord==2), predict(pr outcome(2))

| Interval] |                  | Margin   | Delta-method<br>Std. Err. | z     | P> z  | [95% Conf.] |
|-----------|------------------|----------|---------------------------|-------|-------|-------------|
| -----     |                  |          |                           |       |       |             |
|           | _predict#colrace |          |                           |       |       |             |
| .1154927  | 1 1              | .0956434 | .0101274                  | 9.44  | 0.000 | .0757941    |
| .1171868  | 1 2              | .0894313 | .0141612                  | 6.32  | 0.000 | .0616758    |
| .1178303  | 1 3              | .0872566 | .0155991                  | 5.59  | 0.000 | .0566829    |
|           | _predict#arr1821 |          |                           |       |       |             |
| .1071632  | 1 0              | .0925213 | .0074705                  | 12.38 | 0.000 | .0778794    |
| .1359189  | 1 1              | .0943885 | .0211893                  | 4.45  | 0.000 | .0528582    |

|                          |       |          |          |       |       |           |
|--------------------------|-------|----------|----------|-------|-------|-----------|
| _predict#colrace#arr1821 | 1 1 0 | .0923046 | .0106841 | 8.64  | 0.000 | .0713641  |
| .1132452                 |       |          |          |       |       |           |
| .1845067                 | 1 1 1 | .1244944 | .0306191 | 4.07  | 0.000 | .0644821  |
| .1214619                 | 1 2 0 | .0919923 | .0150358 | 6.12  | 0.000 | .0625227  |
| .1560594                 | 1 2 1 | .0748685 | .0414247 | 1.81  | 0.071 | -.0063224 |
| .1261911                 | 1 3 0 | .0932727 | .0167954 | 5.55  | 0.000 | .0603543  |
| .1230226                 | 1 3 1 | .0419512 | .0413637 | 1.01  | 0.310 | -.0391202 |
|                          |       |          |          |       |       |           |
| _predict#colrace         | 2 1   | .8264836 | .0126761 | 65.20 | 0.000 | .8016389  |
| .8513283                 |       |          |          |       |       |           |
| .8527035                 | 2 2   | .8163312 | .0185577 | 43.99 | 0.000 | .7799588  |
| .861139                  | 2 3   | .8194385 | .0212761 | 38.51 | 0.000 | .777738   |
|                          |       |          |          |       |       |           |
| _predict#arr1821         | 2 0   | .8307854 | .0094784 | 87.65 | 0.000 | .812208   |
| .8493628                 |       |          |          |       |       |           |
| .8199248                 | 2 1   | .7573762 | .0319131 | 23.73 | 0.000 | .6948276  |
|                          |       |          |          |       |       |           |
| _predict#colrace#arr1821 | 2 1 0 | .8354061 | .0133677 | 62.49 | 0.000 | .8092059  |
| .8616062                 |       |          |          |       |       |           |
| .8328359                 | 2 1 1 | .7555666 | .0394238 | 19.17 | 0.000 | .6782973  |
| .8685374                 | 2 2 0 | .8312158 | .019042  | 43.65 | 0.000 | .7938941  |
| .832676                  | 2 2 1 | .6978108 | .06881   | 10.14 | 0.000 | .5629456  |
| .860332                  | 2 3 0 | .8174352 | .0218865 | 37.35 | 0.000 | .7745384  |
| .9859046                 | 2 3 1 | .8373372 | .0758011 | 11.05 | 0.000 | .6887697  |
|                          |       |          |          |       |       |           |
| _predict#colrace         | 3 1   | .077873  | .00886   | 8.79  | 0.000 | .0605077  |
| .0952383                 |       |          |          |       |       |           |
| .1225865                 | 3 2   | .0942375 | .014464  | 6.52  | 0.000 | .0658885  |
| .1260945                 | 3 3   | .0933049 | .0167297 | 5.58  | 0.000 | .0605153  |
|                          |       |          |          |       |       |           |
| _predict#arr1821         | 3 0   | .0766933 | .006866  | 11.17 | 0.000 | .0632362  |
| .0901505                 |       |          |          |       |       |           |
| .2006504                 | 3 1   | .1482353 | .0267429 | 5.54  | 0.000 | .0958201  |
|                          |       |          |          |       |       |           |
| _predict#colrace#arr1821 | 3 1 0 | .0722893 | .0092878 | 7.78  | 0.000 | .0540856  |
| .0904929                 |       |          |          |       |       |           |
| .176066                  | 3 1 1 | .119939  | .0286368 | 4.19  | 0.000 | .063812   |
| .1042014                 | 3 2 0 | .0767919 | .0139847 | 5.49  | 0.000 | .0493825  |

```

.3527989      3 2 1 | .2273207 .0640207 3.55 0.000 .1018426
.1221469      3 3 0 | .0892921 .016763 5.33 0.000 .0564373
.2508544      3 3 1 | .1207116 .0664006 1.82 0.069 -.0094311
-----

```

```

.
. mlogit smokedif18_ord bl.colrace##i.arr1821 arpre18 smokepre18 family_cat usborn if
(female == 1 & colrace != 4), rrr

```

```

Iteration 0: log likelihood = -687.95285
Iteration 1: log likelihood = -654.35604
Iteration 2: log likelihood = -652.6946
Iteration 3: log likelihood = -652.69315
Iteration 4: log likelihood = -652.69315

```

```

Multinomial logistic regression      Number of obs      =      1,089
LR chi2(18)                          =      70.52
Prob > chi2                          =      0.0000
Pseudo R2                             =      0.0513

Log likelihood = -652.69315

```

| smokedif18_ord  | RRR            | Std. Err. | z     | P> z  | [95% Conf. Interval] |          |
|-----------------|----------------|-----------|-------|-------|----------------------|----------|
| 0               |                |           |       |       |                      |          |
| colrace         |                |           |       |       |                      |          |
| 2               | .821517        | .2284683  | -0.71 | 0.480 | .4763135             | 1.416903 |
| 3               | .7967613       | .2539607  | -0.71 | 0.476 | .4265944             | 1.488131 |
| 1.arr1821       | .9799538       | .4033098  | -0.05 | 0.961 | .4374063             | 2.195463 |
| colrace#arr1821 |                |           |       |       |                      |          |
| 2 1             | 2.352552       | 1.718517  | 1.17  | 0.242 | .5620108             | 9.847676 |
| 3 1             | .6689719       | .7869301  | -0.34 | 0.733 | .0666985             | 6.709647 |
| arpre18         | 1.540036       | .4770664  | 1.39  | 0.163 | .8391681             | 2.826265 |
| smokepre18      | 2.89067        | .6590113  | 4.66  | 0.000 | 1.849024             | 4.519125 |
| family_cat      | .7839533       | .1771848  | -1.08 | 0.282 | .5033921             | 1.220883 |
| usborn          | 1.328463       | .8447211  | 0.45  | 0.655 | .3820334             | 4.619527 |
| _cons           | .0708124       | .0469079  | -4.00 | 0.000 | .0193309             | .2593976 |
| 1               | (base outcome) |           |       |       |                      |          |
| 2               |                |           |       |       |                      |          |
| colrace         |                |           |       |       |                      |          |
| 2               | .8624895       | .2408211  | -0.53 | 0.596 | .4989816             | 1.490813 |
| 3               | 1.060175       | .3156039  | 0.20  | 0.844 | .5915387             | 1.900081 |
| 1.arr1821       | .8671425       | .3720929  | -0.33 | 0.740 | .373971              | 2.01068  |
| colrace#arr1821 |                |           |       |       |                      |          |
| 2 1             | 2.637169       | 1.958052  | 1.31  | 0.192 | .615369              | 11.30161 |
| 3 1             | .5712614       | .6737744  | -0.47 | 0.635 | .0566089             | 5.764806 |
| arpre18         | 1.506491       | .4662495  | 1.32  | 0.185 | .8213441             | 2.763173 |
| smokepre18      | 3.252972       | .7347989  | 5.22  | 0.000 | 2.089326             | 5.064707 |
| family_cat      | .7708857       | .1733143  | -1.16 | 0.247 | .4961566             | 1.197736 |
| usborn          | 1.554947       | .9840358  | 0.70  | 0.485 | .4498209             | 5.375163 |
| _cons           | .0558163       | .0368705  | -4.37 | 0.000 | .0152927             | .2037223 |

. margins colrace##arr1821

Predictive margins  
 Model VCE : OIM

Number of obs = 1,089

1. \_predict : Pr(smokedif18\_ord==0), predict(pr outcome(0))  
 2. \_predict : Pr(smokedif18\_ord==1), predict(pr outcome(1))  
 3. \_predict : Pr(smokedif18\_ord==2), predict(pr outcome(2))

```
-----
```

| Interval]                | Margin | Delta-method<br>Std. Err. | z        | P> z  | [95% Conf.      |
|--------------------------|--------|---------------------------|----------|-------|-----------------|
| -----                    |        |                           |          |       |                 |
| _predict#colrace         |        |                           |          |       |                 |
| .129876                  | 1 1    | .1040294                  | .0131873 | 7.89  | 0.000 .0781829  |
| .1306476                 | 1 2    | .0962603                  | .0175449 | 5.49  | 0.000 .061873   |
| .12032                   | 1 3    | .0820226                  | .0195398 | 4.20  | 0.000 .0437253  |
| _predict#arr1821         |        |                           |          |       |                 |
| .1142887                 | 1 0    | .0958995                  | .0093824 | 10.22 | 0.000 .0775102  |
| .1719998                 | 1 1    | .1129704                  | .0301176 | 3.75  | 0.000 .0539409  |
| _predict#colrace#arr1821 |        |                           |          |       |                 |
| .1314667                 | 1 1 0  | .1039731                  | .0140276 | 7.41  | 0.000 .0764795  |
| .1713581                 | 1 1 1  | .1039057                  | .0344151 | 3.02  | 0.003 .0364534  |
| .1232604                 | 1 2 0  | .0890152                  | .0174724 | 5.09  | 0.000 .0547699  |
| .302881                  | 1 2 1  | .1604522                  | .0726691 | 2.21  | 0.027 .0180235  |
| .124655                  | 1 3 0  | .0843899                  | .0205438 | 4.11  | 0.000 .0441248  |
| .1813942                 | 1 3 1  | .0620167                  | .060908  | 1.02  | 0.309 -.0573607 |
| _predict#colrace         |        |                           |          |       |                 |
| .8303281                 | 2 1    | .7967135                  | .0171507 | 46.45 | 0.000 .7630988  |
| .849919                  | 2 2    | .8058834                  | .0224676 | 35.87 | 0.000 .7618477  |
| .8677151                 | 2 3    | .8148313                  | .026982  | 30.20 | 0.000 .7619476  |
| _predict#arr1821         |        |                           |          |       |                 |
| .8291366                 | 2 0    | .8050022                  | .0123137 | 65.37 | 0.000 .7808679  |
| .8581887                 | 2 1    | .7822692                  | .0387352 | 20.20 | 0.000 .7063496  |
| _predict#colrace#arr1821 |        |                           |          |       |                 |
| .8311687                 | 2 1 0  | .7954452                  | .0182266 | 43.64 | 0.000 .7597217  |

|          |                          |  |          |          |       |       |           |
|----------|--------------------------|--|----------|----------|-------|-------|-----------|
| .8943192 | 2 1 1                    |  | .8071007 | .0445001 | 18.14 | 0.000 | .7198821  |
| .8654393 | 2 2 0                    |  | .8204796 | .022939  | 35.77 | 0.000 | .7755199  |
| .8536008 | 2 2 1                    |  | .6787223 | .0892254 | 7.61  | 0.000 | .5038438  |
| .8625077 | 2 3 0                    |  | .8069359 | .0283535 | 28.46 | 0.000 | .7513641  |
| 1.040172 | 2 3 1                    |  | .8774437 | .083026  | 10.57 | 0.000 | .7147156  |
|          |                          |  |          |          |       |       |           |
|          | _predict#colrace         |  |          |          |       |       |           |
| .1242278 | 3 1                      |  | .0992571 | .0127404 | 7.79  | 0.000 | .0742864  |
| .1325253 | 3 2                      |  | .0978563 | .0176886 | 5.53  | 0.000 | .0631874  |
| .1453934 | 3 3                      |  | .103146  | .0215552 | 4.79  | 0.000 | .0608987  |
|          |                          |  |          |          |       |       |           |
|          | _predict#arr1821         |  |          |          |       |       |           |
| .1177071 | 3 0                      |  | .0990983 | .0094945 | 10.44 | 0.000 | .0804895  |
| .1614374 | 3 1                      |  | .1047605 | .0289173 | 3.62  | 0.000 | .0480835  |
|          |                          |  |          |          |       |       |           |
|          | _predict#colrace#arr1821 |  |          |          |       |       |           |
| .1273356 | 3 1 0                    |  | .1005817 | .0136502 | 7.37  | 0.000 | .0738278  |
| .150202  | 3 1 1                    |  | .0889936 | .0312293 | 2.85  | 0.004 | .0277853  |
| .1250727 | 3 2 0                    |  | .0905052 | .0176368 | 5.13  | 0.000 | .0559377  |
| .3025051 | 3 2 1                    |  | .1608254 | .0722869 | 2.22  | 0.026 | .0191457  |
| .1538208 | 3 3 0                    |  | .1086742 | .0230344 | 4.72  | 0.000 | .0635276  |
| .176949  | 3 3 1                    |  | .0605396 | .0593936 | 1.02  | 0.308 | -.0558698 |

```

-----
----
.
. *mlogit smokedif19_ord b1.colrace##i.arr1821 arpre18 smokepre18 family_cat usborn if
(female == 1 & colrace != 4), rrr
.
end of do-file

. log close

```
